# Supplementary material for: Organisational challenges of pain management in neonatal intensive care unit: a qualitative study
Source: PubMed Central journal article supplement — BMJ Open. 2023 Sep 5;13(9):e072695. doi: 10.1136/bmjopen-2023-072695 (PMC10481740; doi:10.1136/bmjopen-2023-072695), 2023-09-05
Supplement: bmjopen-2023-072695.draft_revisions.pdf [file bmjopen-2023-072695.draft_revisions.pdf]

# BMJ Open

BMJ Open is committed to open peer review. As part of this commitment we make the peer review history of every article we publish publicly available.

When an article is published we post the peer reviewers' comments and the authors' responses online. We also post the versions of the paper that were used during peer review. These are the versions that the peer review comments apply to.

The versions of the paper that follow are the versions that were submitted during the peer review process. They are not the versions of record or the final published versions. They should not be cited or distributed as the published version of this manuscript.

BMJ Open is an open access journal and the full, final, typeset and author-corrected version of record of the manuscript is available on our site with no access controls, subscription charges or pay-per-view fees (<http://bmjopen.bmj.com>).

If you have any questions on BMJ Open's open peer review process please email [info.bmjopen@bmj.com](mailto:info.bmjopen@bmj.com)

# BMJ Open

## Organizational Challenges of Neonatal Pain Management in Intensive Care Unit: Perception of Health Professionals

|                               |                                                                                                                                                                                                                                          |
|-------------------------------|------------------------------------------------------------------------------------------------------------------------------------------------------------------------------------------------------------------------------------------|
| Journal:                      | <i>BMJ Open</i>                                                                                                                                                                                                                          |
| Manuscript ID                 | bmjopen-2023-072695                                                                                                                                                                                                                      |
| Article Type:                 | Original research                                                                                                                                                                                                                        |
| Date Submitted by the Author: | 11-Feb-2023                                                                                                                                                                                                                              |
| Complete List of Authors:     | neshat, hanieh; Tabriz University of Medical Sciences<br>hassankhani, hadi; Tabriz University of Medical Sciences<br>jabraeili, mahnaz; Tabriz University of Medical Sciences<br>Negarandeh, Reza; Tehran University of Medical Sciences |
| Keywords:                     | Neonatal intensive & critical care < INTENSIVE & CRITICAL CARE, PAIN MANAGEMENT, Organisation of health services < HEALTH SERVICES ADMINISTRATION & MANAGEMENT, QUALITATIVE RESEARCH                                                     |
|                               |                                                                                                                                                                                                                                          |

SCHOLARONE™  
Manuscripts

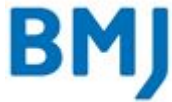

I, the Submitting Author has the right to grant and does grant on behalf of all authors of the Work (as defined in the below author licence), an exclusive licence and/or a non-exclusive licence for contributions from authors who are: i) UK Crown employees; ii) where BMJ has agreed a CC-BY licence shall apply, and/or iii) in accordance with the terms applicable for US Federal Government officers or employees acting as part of their official duties; on a worldwide, perpetual, irrevocable, royalty-free basis to BMJ Publishing Group Ltd ("BMJ") its licensees and where the relevant Journal is co-owned by BMJ to the co-owners of the Journal, to publish the Work in this journal and any other BMJ products and to exploit all rights, as set out in our [licence](#).

The Submitting Author accepts and understands that any supply made under these terms is made by BMJ to the Submitting Author unless you are acting as an employee on behalf of your employer or a postgraduate student of an affiliated institution which is paying any applicable article publishing charge ("APC") for Open Access articles. Where the Submitting Author wishes to make the Work available on an Open Access basis (and intends to pay the relevant APC), the terms of reuse of such Open Access shall be governed by a Creative Commons licence – details of these licences and which [Creative Commons](#) licence will apply to this Work are set out in our licence referred to above.

Other than as permitted in any relevant BMJ Author's Self Archiving Policies, I confirm this Work has not been accepted for publication elsewhere, is not being considered for publication elsewhere and does not duplicate material already published. I confirm all authors consent to publication of this Work and authorise the granting of this licence.

1  
2  
3 **1 Title**  
4

5 2 Organizational Challenges of Neonatal Pain Management in Intensive Care Unit: Perception  
6  
7  
8 3 of Health Professionals  
9

10 **4 Author information**  
11

12 5 **Hanieh Neshat**; RN, MSc, BSc  
13

14 6 PhD in nursing, Pediatric Health Research center, Tabriz University of Medical Sciences,  
15  
16  
17 7 Tabriz, Iran  
18

19 8 Faculty of Nursing and Midwifery, Tabriz University of Medical Sciences, Tabriz, Iran,  
20

21 9 ORCID: 0000-0003-1359-6467  
22  
23

24 10 **Hadi Hassankhani**; RN, PhD, MSc, BSc  
25

26 11 Professor in Nursing, Department of Medical and Surgical Nursing, Faculty of Nursing and  
27  
28  
29 12 Midwifery, Tabriz University of Medical Sciences, Tabriz, Iran  
30

31 13 ORCID: 0000-0001-7620-6425  
32

33 14 **Mahnaz Jabraeili**; RN, PhD, MSc, BSc  
34

35 15 Assistant Professor in Nursing, Department of pediatrics, Faculty of Nursing and Midwifery,  
36  
37  
38 16 Tabriz University of Medical Sciences, Tabriz, Iran  
39

40 17 ORCID: 0000-0002-4035-1433  
41

42 18 **Reza Negarandeh**; RN, PhD, MSc, BSc  
43

44 19 Professor in Nursing, Nursing and Midwifery Care Research Center, School of Nursing and  
45  
46  
47 20 Midwifery, Tehran University of Medical Sciences, Tehran, Iran  
48

49 21 ORCID: 0000-0002-7597-5094. [negarandeh@gmail.com](mailto:negarandeh@gmail.com)  
50

51 22 **Corresponding author:** Hadi Hassankhani, School of Nursing and Midwifery, Tabriz  
52  
53  
54 23 University of Medical Sciences, Tabriz, Iran. E-mail: [hanie.neshat@yahoo.com](mailto:hanie.neshat@yahoo.com)  
55

56 24 Tel: +98-9183181267  
57  
58  
59 25

1  
2  
3 26 **Organizational Challenges of Neonatal Pain Management in Intensive Care Unit:**  
4  
5 27 **Perception of Health Professionals**  
6  
7  
8 28

9  
10 29 **Abstract**  
11

12 30 **Objectives:** Despite credible evidence, managing neonates' pain in the neonatal intensive care  
13  
14 31 unit is a challenging issue. In this regard, the organizational context is an important factor. The  
15  
16 32 existing challenges vary depending on the context and investigating them can help to improve  
17  
18 33 the quality of services. The study aimed to explore organizational challenges to neonates' pain  
19  
20 34 management in the neonatal intensive care unit.  
21  
22

23  
24 35 **Methods:** This qualitative study included 31 nurses and physicians in the neonatal intensive  
25  
26 36 care unit of Children's Hospital. Data collection was done through individual and focus group  
27  
28 37 interviews. For data analysis, we used conventional content analysis.  
29

30  
31 38 **Results:** The identified challenges included organizational culture (poor interprofessional  
32  
33 39 collaboration and low parental participation), organizational structure (lack of unified approach  
34  
35 40 in relieving pain and limited supervision for pain management), and organizational resources  
36  
37 41 (lack of time due to high workload and inadequate educational programs).  
38  
39

40 42 **Conclusions:** Many organizational factors consistently affect the neonatal pain management.  
41  
42 43 Adopting some approaches to enhance the cooperation of treatment team members, holding  
43  
44 44 educational programs, proper organizational supervision, and implementing a unified neonatal-  
45  
46 45 based pain management program could improve neonatal pain management.  
47  
48

49  
50  
51 47 **Strengths and limitations**  
52

53  
54 48 Strengths are:  
55  
56  
57  
58  
59  
60

- 1  
2  
3 49 • The exclusive focus on the organizational challenges of neonatal pain management in  
4  
5 50 the clinical setting of developing country, which has been less addressed in other  
6  
7 51 studies.  
8  
9  
10 52 • The inclusion of a range of health professionals across different caring situations,  
11  
12 53 educational levels, and work experiences.  
13  
14 54 • Triangulation in data collection (individual interviews and focus groups) which  
15  
16 55 increases the trustworthiness of the findings.  
17  
18 56 • Providing strategies in the discussion that can be useful for solving challenges and  
19  
20 57 improving the quality of practice in settings of developing countries.  
21  
22  
23

24 58 Limitation is:

- 25  
26 59 • Sampling of single NICU and lack of organizational diversity.  
27  
28  
29  
30

## 31 61 **Background**

32  
33 62 Nowadays, the survival rate of neonates admitted to the neonatal intensive care unit (NICU)  
34  
35 63 has increased. Therefore, it is essential to optimize the NICU care and reduce the complications  
36  
37 64 of survived cases. In this regard, proper neonates' pain control is a priority. Despite the  
38  
39 65 misconceptions in the past, scientists have proved the neonates' perception of pain in recent  
40  
41 66 decades <sup>1</sup>.  
42  
43  
44

45 67 Pain can increase the demand in the cardiovascular system and endanger the hemodynamic  
46  
47 68 status of the neonate by increasing the heart rate and decreasing the arterial oxygen saturation.  
48

49 69 It also increases the risk of intraventricular hemorrhage by increasing blood pressure in the  
50  
51 70 germinal matrix. The weak immune system and increased risk of infections are other problems  
52  
53 71 related to pain tolerance in neonates. Anxiety, abnormalities in processing pain (hypo- or hyper  
54  
55 72 sensitivity to pain), and developmental problems are some long-term effects of inappropriate  
56  
57 73 pain management in neonates <sup>2</sup>. Studies show that the prevention of pain in the neonate is not  
58  
59  
60

1  
2  
3 74 only ethically essential, but it is also necessary for preventing short-term and long-term  
4  
5 75 complications and developmental disorders in neonates<sup>3,4</sup>.

6  
7  
8 76 Although there have been theoretical advances and clinical guidelines related to pain  
9  
10 77 management in the NICU, it is still a severe challenge in complex care conditions <sup>5</sup> and needs  
11  
12 78 further research <sup>6</sup>. According to previous studies, the lack of knowledge in service providers is  
13  
14 79 the significant barriers to optimal pain management<sup>7,8</sup>. The evidence shows that the knowledge  
15  
16 80 of care providers and their perceived responsibility for managing pain is significantly related  
17  
18 81 to the organization's policies <sup>9</sup>. Nowadays, health care accreditation centers consider the  
19  
20 82 optimal management of pain as one of the indicators for evaluating the quality of care. They  
21  
22 83 extend patient pain management from an individual issue to an organizational issue and  
23  
24 84 emphasize the importance of the organization in providing safe care. Hence, the researchers  
25  
26 85 are trying to understand the role of organization in this area <sup>10</sup>.

27  
28  
29 86 Evidence suggests that differences in service quality may be due to organizational differences  
30  
31 87 <sup>11</sup>. In this regard, a study examined the role of organizational factors (culture, structure,  
32  
33 88 resources, capabilities, skills, and policies) in the NICU pain management of a developed  
34  
35 89 country and discussed the existing challenges <sup>12</sup>. However, there is a belief that the NICU  
36  
37 90 context in developed countries may be different from developing countries, leading to different  
38  
39 91 pain management challenges in them <sup>13</sup>.

40  
41  
42 92 Although some studies have evaluated pain management in the NICU, limited studies have  
43  
44 93 focused on organizational challenges in developing countries. Accordingly, the present  
45  
46 94 descriptive qualitative study aimed to investigate the organizational challenges of NICU pain  
47  
48 95 management in Tabriz, Iran.

49  
50  
51 96

## 52 53 54 55 56 97 **Methods**

1  
2  
3 98 Interpretive descriptive method was used to evaluate the perceptions of health professionals  
4  
5 99 on organizational pain management challenges in the NICU. Descriptive qualitative research  
6  
7  
8 100 helps to describe or discover a phenomenon or a problem, and the researcher can use it to  
9  
10 101 examine a wide range of topics related to people's experiences, perceptions, and perspectives  
11  
12 102 <sup>14</sup>.

103

### 104 **Ethical Considerations**

105 The Ethics Committee of Tabriz University of Medical Sciences approved the study (code:  
106 IR.TBZMED.REC.1398.985). The first author explained the purpose of the research to the  
107 NICU staff, and answered their questions. She also informed them about the voluntary nature  
108 of the participation, their right to privacy, confidentiality and to withdraw from the study at any  
109 time without given any reason. Then, staff were asked to participate in the study by the first  
110 author. Volunteered participants received, and studied written information. They completed the  
111 consent form and also expressed their willingness to participate in the individual or focus  
112 interviews.

113

### 114 **Setting and Participants**

115 This study was carried out in the NICU of Children Hospital in Tabriz. The NICU has 27 beds  
116 in three levels of care that admit full-term and premature neonates with various diseases. In  
117 this unit, different types of painful interventions are performed according to the newborns'  
118 needs. The participants included 31 nurses and physicians in the NICU (Table1).

119 Table 1. Demographic Characteristics of Participants

| Participants (N=31) | Age (Year) | Marital status Married/Single | Educational status | Organizational position  | Work experience (Year) |
|---------------------|------------|-------------------------------|--------------------|--------------------------|------------------------|
| Nurse (N=26)        | 30-44      | 23 / 3                        | MSc =1<br>BSc =25  | Clinical<br>Supervisor=1 | 5-20                   |



|                 |       |       |                                                |                                                          |      |
|-----------------|-------|-------|------------------------------------------------|----------------------------------------------------------|------|
|                 |       |       |                                                | Educational Supervisor=1<br>Head Nurse=2<br>Nurse=22     |      |
| Physician (N=5) | 35-48 | 5 / 0 | Neonatologist=4<br>Fellowship of neonatology=1 | Academic Member=2<br>Clinical Physician=2<br>Assistant=1 | 4-18 |

120

121 The purposive sampling was used and interested participants with different ages, educational  
 122 levels, work experiences, and organizational positions were selected for either individual or  
 123 focus interviews.

124

### 125 Data Collection

126 Data were collected during 11 individual interviews and three focus group discussions with 7-,  
 127 8-, and 5-participants, respectively. The individual interviews lasted an average of 42 minutes  
 128 and were performed in the coffee room, according to the preference of the participants. The  
 129 interviews were voice-recorded after obtaining the participants' consent. We also used the  
 130 focus group discussions to gain a deeper understanding of neonates' pain management.  
 131 Integrating individual and focus interviews makes a productive process and enriches data to  
 132 conceptualize the phenomenon <sup>15</sup>. The first author led the individual and focus interviews using  
 133 a semi-structured interview guide (Table 2). After 11 individual and three focus interviews,  
 134 data saturation was obtained.

### 135 Table 2. Interview Guide

Main questions:

It's very valuable for me to know about your experiences of managing infant pain in your NICU. Please talk about them if you wish.

What are health care services provided to manage the infant pain in your NICU?

1  
2  
3  
4  
5  
6  
7  
8  
9  
10  
11  
12  
13  
14  
15  
16  
17  
18  
19  
20  
21  
22  
23  
24  
25  
26  
27  
28  
29  
30  
31  
32  
33  
34  
35  
36  
37  
38  
39  
40  
41  
42  
43  
44  
45  
46  
47  
48  
49  
50  
51  
52  
53  
54  
55  
56  
57  
58  
59  
60

What are the problems in managing infant pain in your NICU?

What organizational factors are effective in managing the neonatal pain?

Probing questions:

Could you explain more?

What do you mean?

Can you give an example to clarify further?

136

### 137 **Patient and public involvement**

138 No patient involved.

### 139 **Data Analysis**

140 Conventional content analysis was used to interpret the transcripts. In this approach, inductive

141 codes, sub-themes, and themes emerged from the transcripts. We used Graneheim and

142 Lundman algorithms to analyze the data <sup>16</sup>. MAXQDA10 software was used for data analysis.

143 The data analysis steps were presented in Table 3.

144 Table 3. The Steps of Data Analysis

A- The first author transcribed each interview and read it several times to obtain a comprehensive view.

B- Sentences, and paragraphs considered as the meaning units were condensed according to their content.

C- The condensed meaning units were abstracted and labeled with codes.

D- A group of 4 researchers (HN, HH, MJ, and RN) reviewed and discussed condensed meaning units and codes once more to resolve any conflicts that may exist in the concept of one code or any possible similarities in several codes.

E- They sorted the codes based on their similarities and differences to sub-themes.

F- Finally, themes were formulated from the classification of sub-themes.

145

146

### 147 **Trustworthiness**

148 We used Guba and Lincoln's criteria to assess trustworthiness <sup>17</sup>. Credibility was enhanced

149 through purposive sampling with the principle of maximum variation to select the participants.

150 In addition to individual interviews, we used focus groups to collect data. Also, to verify the

151 data and the extracted codes, the member check was used. The researchers were familiar with

152 the NICU department, and they were experienced in qualitative research. For the study's

153 dependability, we tried to clearly describe the research steps taken from the beginning of the

154 research project to the development and reporting of findings. We also used the probing

155 questions to increase dependability. In addition, the process of data collection and findings

156 were audited by experts, which helped promote confirmability.

157

### 158 **Results**

159 Three main themes and six sub-themes that explained the organizational challenges to optimal

160 neonates' pain management in the NICU were identified (Table 4).

161 Table 4. Themes and Sub-themes

| Themes                   | Sub-themes                              |
|--------------------------|-----------------------------------------|
| Organizational culture   | Poor interprofessional collaboration    |
|                          | Low parental participation              |
| Organizational structure | Lack of unified approach to pain relief |
|                          | Limited supervision for pain management |
| Organizational resources | Lack of time due to high workload       |

|  |                                 |
|--|---------------------------------|
|  | Inadequate educational programs |
|--|---------------------------------|

162

## 163 **Organizational Culture**

### 164 *Poor interprofessional collaboration*

165 According to the participants, individual decision-making on doing tasks and poor coordination  
166 among team members led to such problems as repetitive manipulations of the neonates,  
167 disorganization, and limited opportunities to relieve the neonates' pain. Also, the staff did not  
168 talk to each other about the pain management of the neonates and no suggestions were  
169 exchanged between them. Although the nurses talked to physicians about the need to control  
170 neonates' pain and made suggestions in some cases, they were usually dismissed by the  
171 physicians because they had more decision-making power.

172

173 *"Staff just want to do their job. For example, the doctor comes and says: 'I want to do an LP*  
174 *on the infant.' Without coordinating the things related to managing the neonate's pain with the*  
175 *nurse!"* (Participant 3)

176

### 177 *Low parental participation*

178 Although the parents were present in the ward, they were not considered as the members of the  
179 care team, and were not often consulted. The participants believed that the staff was usually  
180 controlling the parents, and the parents acted according to the staff's wishes. Usually, parents  
181 are given limited information about their neonate's pain and how to participate and relieve it.  
182 This led to a one-way and non-interactive relationship between family and the staff. As a result,  
183 they were unable to play a fully effective role in activities such as relieving their neonate's  
184 pain.

185

186 *“In our ward, usually we do not involve the parents in controlling the baby’s pain. Most of the*  
187 *times, the staff asks the parents to go out and come back after managing the neonate’s pain.*  
188 *This is a quite acceptable behavior in the ward.”* (Participant 21)

189

## 190 **Organizational structure**

### 191 *Lack of unified approach in relieving pain*

192 According to the participants, there were no predefined and specific policy for pain control in  
193 the ward. As a result, no positive atmosphere and clear expectations in terms of pain-relieving  
194 actions were created. This caused a lack of strong support for the implementation of evidence  
195 in practice. Although several health care professionals working in the NICU did things to  
196 relieve the neonates’ pain based on their personal preference, credible pain assessment tools  
197 and pain prevention and management policies were not used abundantly. Thus, there were  
198 disagreements and arbitrary pain management in the ward. The participants believed that  
199 introduction of specific protocols could help to improve outcomes and develop optimal pain  
200 management practices in the NICU, leading to the uniformity of the performance among  
201 different professions and clinicians.

202

203 *“Currently, it is not clear what we should do to control the pain in different situations. For*  
204 *example, we don’t know what exactly to do to control the pain of a neonate after surgery. The*  
205 *internal medicine and surgery team members have different opinions on this issue, and their*  
206 *lack of understanding sometimes causes the neonate not to be given painkillers at all.”*  
207 (Participant 1)

208

1  
2  
3 209 “We have different neonatologists with different methods of practicing; some of them prescribe  
4  
5 210 painkillers more commonly than others. Perhaps we could have some predefined instructions  
6  
7 211 for a variety of methods or painful pain management because some care-providers might think  
8  
9 212 that a specific method is not very painful.” (Participant 13)  
10  
11  
12

13 213

#### 14 214 *Limited supervision for pain management*

15  
16  
17 215 There is little demand from the organization regarding the neonatal pain management. Also,  
18  
19 216 the staff’s performance regarding neonatal pain management is not supervised. The participants  
20  
21 217 explained that the Hospital Quality Assurance Committee had no policies on assessing the  
22  
23 218 quality of neonatal pain management. Also, the patients’ pain management was not explicitly  
24  
25 219 mentioned in the job description of the staff, and the neonates’ pain management was not  
26  
27 220 examined in the monthly and annual performance evaluations of the staff. Thus, the  
28  
29 221 performance of health professionals regarding the use of analgesics was not often questioned.  
30  
31 222 However, in some cases, verbal warning were delivered to some health professionals highly  
32  
33 223 inattentive to the patients’ pain. Furthermore, there were no clear policies to encourage health  
34  
35 224 professionals who performed well in managing the neonates’ pain. Accordingly, appropriate  
36  
37 225 management of the neonates’ pain was not considered a professional value.  
38  
39  
40  
41

42 226

43  
44  
45 227 “Nobody asks staff about the quality of their performance in relieving infant’s pain. We feel  
46  
47 228 we’re not evaluated or monitored in this regard; and we are completely free to do it or not.”  
48  
49 229 (Participant 10)  
50

51 230

#### 52 53 54 231 **Organizational Resources**

55  
56  
57 232 *Lack of time due to high workload*  
58  
59  
60

1  
2  
3 233 According to the participants, a high workload was another challenge to appropriate pain  
4  
5 234 management in the NICU. In most cases, the health professionals did not have a good  
6  
7  
8 235 performance in relieving the neonates' pain due to lack of time and work overload. Care-  
9  
10 236 providers mentioned the large number of patients as a challenge for pain management. They  
11  
12 237 believed that high workload resulted in limited attention to the neonates' pain and not using  
13  
14 238 analgesics before the procedures. Also, some nurses believed that less pain during the  
15  
16  
17 239 procedure required two nurses, but the lack of time made it impossible for them to help their  
18  
19 240 colleagues during the painful procedure.  
20  
21  
22 241

23  
24 242 *"A nurse with three patients may admit another one. This workload makes pain management*  
25  
26 243 *difficult. She/he only thinks of doing their duties quickly and finishing the shift."* (Participant  
27  
28 244 25)  
29  
30

#### 31 245 32 33 246 *Inadequate educational program*

34  
35 247 According to the participants, the lack of effective training programs and consequently  
36  
37 248 insufficient knowledge caused the staff not to know the benefits and importance of controlling  
38  
39  
40 249 the neonates' pain. Some of the educational needs mentioned by the participants included  
41  
42 250 gaining knowledge and skills in using pain assessment tools and pain management techniques  
43  
44 251 appropriate for different situations and procedures, as well as using analgesics. From the  
45  
46  
47 252 participants' point of view, attending in-service training courses for managing the neonates'  
48  
49 253 pain and participation in research projects or quality improvement activities could increase the  
50  
51 254 health professionals' awareness of the neonates' pain and its treatment benefits.  
52  
53

54 255  
55  
56  
57  
58  
59  
60

1  
2  
3 256 *“There is no training program for the NICU staff about the importance and methods of*  
4  
5 257 *relieving pain in neonates. Since the treatment team members know little about this issue, we*  
6  
7 258 *should not expect them to perform well.”* (Participant 24)  
8  
9  
10  
11 259

## 14 260 **Discussion**

16 261 According to our results, organizational factors, including cultural, structural, and resource  
17  
18 262 issues, can affect the optimal control of neonates' pain in the NICU.

21 263 Organizational culture is the model of group's prevalent assumptions, which develops through  
22  
23 264 a shared history, experiences, and learning <sup>12</sup>. The health professionals who participated in our  
24  
25 265 study believed that the low participatory culture and poor collaboration of health team members  
26  
27 266 threatened the optimal management of the neonates' pain. This issue has caused such problems  
28  
29 267 as over-stimulation of the neonates, inconsistencies in providing services, and losing  
30  
31 268 opportunities in relieving the pain. Interprofessional collaboration is a way in which different  
32  
33 269 health care professionals interact with each other to make clinical decisions after considering  
34  
35 270 each other's knowledge. In this way, the specialists undertake complementary roles and get  
36  
37 271 involved in problem-solving and decision-making processes to develop and implement patient  
38  
39 272 care programs <sup>18</sup>. Participants in the study cited the clinical dominance of physicians over  
40  
41 273 nurses as a barrier to appropriate collaboration. Power imbalances in clinical practice are a key  
42  
43 274 barrier to joint decision-making, which can affect the quality of care <sup>19</sup>. The findings of our  
44  
45 275 study are supported by the other literature. Mirlashari et al. showed that the power imbalance  
46  
47 276 between physicians and nurses in Iranian NICUs leads to insufficient team collaboration in  
48  
49 277 providing care <sup>20</sup>. In studies conducted in developed countries, proper communication and  
50  
51 278 interprofessional collaboration in complex care settings such as the NICU was considered the  
52  
53 279 vital element of effective practice on pain <sup>12,21,22</sup>. According to studies, finding communication  
54  
55  
56  
57  
58  
59  
60



1  
2  
3 280 channels between the health care members can reduce power imbalance and improve their  
4  
5 281 ability to negotiate about pain management approaches <sup>23</sup>. In contrast of our study finding,  
6  
7 282 Tavernier et al. identified team collaboration as a contextual factor to optimal pain management  
8  
9 283 in U.S. hospitals. They acknowledged that interprofessional educational programs have  
10  
11 284 improved communication between the disciplines and supported collaborative relationships <sup>24</sup>.  
12  
13 285 This strategy can be used in countries such as Iran, where insufficient communication and  
14  
15 286 collaboration of health professionals is considered as a challenge in the quality of care. The  
16  
17 287 users of educational programs of Iranian health institutions are traditionally all from the same  
18  
19 288 discipline. Also, evidence-based strategies, such as interprofessional practice teams, can  
20  
21 289 improve the interprofessional collaboration <sup>25</sup>.  
22  
23  
24 290 The findings of this study indicate insufficient parent-health professional collaboration in the  
25  
26 291 neonates' pain management. Organizational culture did not adequately support parental  
27  
28 292 involvement, and relationships between parents and professionals was affected by power  
29  
30 293 imbalances. Parents often did not receive sufficient information and their participation in the  
31  
32 294 decision making and service providing was not considered in the practice. Although few  
33  
34 295 parental care involvement research is done in developing countries such as Iran, this finding is  
35  
36 296 supported by other Iranian study <sup>20,26</sup>. Khajeh et al. found that families in Iranian medical fields  
37  
38 297 are considered non-participating visitors <sup>27</sup>. Other studies in Finland, Sweden, the United States  
39  
40 298 and China showed that the level of parental involvement in the management of neonatal pain  
41  
42 299 varies, from parental absence to their full collaboration <sup>28,29</sup>. However, The participation of the  
43  
44 300 patients' family members and health care professionals is essential to provide optimal care <sup>30</sup>.  
45  
46 301 There are positive effects of parental involvement in the literature of developed countries, such  
47  
48 302 as reducing parental stress <sup>31</sup>, facilitating parent/ infant attachment <sup>32</sup>, and more effectively  
49  
50 303 manage neonatal pain <sup>33</sup>. Axelin et al. pointed out that when the health professionals  
51  
52 304 relationship with the parents is paternalistic, parents were usually absent or passive in  
53  
54  
55  
56  
57  
58  
59  
60

1  
2  
3 305 managing their neonate pain. They believed that implication of Family-Centered Care (FCC)  
4  
5 306 approach had a positive effect on information sharing and parental involvement in neonatal  
6  
7 307 pain management <sup>28</sup>. Mirlashari et al. also acknowledged that the low parental involvement in  
8  
9 308 Iranian NICUs is due to the marginalized FCC <sup>20</sup>. In the FCC model, the family is an essential  
10  
11 309 member of the health care team and has a close relationship with staff. In this model the parents  
12  
13 310 are the most influential contributors to caring for their neonates in the NICU <sup>34</sup>. Some studies  
14  
15 311 showed that the implementation of FCC model could increase the parents' participation in  
16  
17 312 neonates' pain management <sup>22,35</sup>. Evidence highlights the role of the organization in creating  
18  
19 313 instructions to change the context and provide the optimal parental involvement in neonatal  
20  
21 314 care <sup>21</sup>.

22  
23  
24  
25  
26 315 The lack of clear policy and supervising the health professionals' performance in relieving the  
27  
28 316 neonates' pain are the main challenges related to organizational structure. This increases the  
29  
30 317 evidence-practice gap and causes the staff to use analgesics based on their individual opinions  
31  
32 318 and knowledge, which can lead to improper neonates' pain management. This finding is  
33  
34 319 supported by some studies in Iran <sup>36</sup> and other developing countries <sup>37,38</sup>. Studies often  
35  
36 320 conducted in developed countries emphasize the facilitation of optimal pain management with  
37  
38 321 clear organizational protocols and quality improvement policies <sup>12,24</sup>. A longitudinal study in  
39  
40 322 Sweden showed that the development of the program about the neonatal pain management and  
41  
42 323 stay on it increased the rate of the using of pain assessment tools 80% since 1993 to 2008 <sup>39</sup>.  
43  
44 324 Nowadays, reputable institutions and neonatal pain specialists recommend that the NICUs  
45  
46 325 should have evidence-based step-by-step protocol and continuous auditing program to optimal  
47  
48 326 neonates' pain management <sup>40</sup>. The American Academy of Pediatrics (AAP) listed the  
49  
50 327 components of the neonates' pain management protocol that include strategies to minimize the  
51  
52 328 number of performed painful procedures, routine pain assessment programs, and  
53  
54 329 pharmacological and non-pharmacological treatments for pain management during surgery and  
55  
56  
57  
58  
59  
60

1  
2  
3 330 procedures<sup>41</sup>. Stevens et al. used the evidence-based Practice for Improving Quality method  
4  
5 331 and implemented a multifaceted intervention to improve pain management in Canadian  
6  
7 332 pediatric hospitals that can be used in other settings. After examining the unit's base-line pain  
8  
9 333 practices and reviewing evidence of pain assessment and management in a participatory  
10  
11 334 process, they identified their protocol and improved the level of pain management with step-  
12  
13 335 by-step interventions including educational sessions, reminders, audit and feedback<sup>42</sup>.

16 336 Organizational resources include the supplies and time necessary to meet work demands.  
17  
18 337 Achieving this organizational feature requires sufficient staff with the appropriate expertise to  
19  
20 338 be able to balance the job demands, workload, and time. In our study, some nurses raised time  
21  
22 339 management concerns more frequently than addressing their concerns about the neonates' pain  
23  
24 340 management. High workload and lack of time can restrict the introduction of new practices,  
25  
26 341 such as the neonates' pain management. Moreover, a high workload can cause physical and  
27  
28 342 mental fatigue in staff and negatively affect their performance. Work overload and lack of time  
29  
30 343 are the international challenge in health institutions that affect in quality of care. Similar to our  
31  
32 344 finding, the studies that conducted in in Iran<sup>43</sup> and other countries such as the US, England,  
33  
34 345 and China<sup>24,29,44</sup> mentioned high workload as a barrier to optimal management of patient pain.  
35  
36 346 Although part of the high workload is due to the nurse shortage, which requires interventions  
37  
38 347 at the international and national levels, nevertheless, some solutions such as reducing indirect  
39  
40 348 care time by supplies availability, providing enough off-duty hours, and more payments for  
41  
42 349 extra work hours can motivate nurses and improved the quality of neonatal pain management  
43  
44 350 in busy settings.

45  
46 351 Inadequate training programs on the neonates' pain management was another problem related  
47  
48 352 to organizational resources. According to the participants, the knowledge about various areas  
49  
50 353 of pain management was at a low level due to inadequate training. Although Cong et al.  
51  
52 354 concluded that care providers' knowledge of neonatal pain has changed dramatically in recent  
53  
54  
55  
56  
57  
58  
59  
60

1  
2  
3 355 decades<sup>29</sup>, there is still a need to improve it. Studies in developed and developing countries  
4  
5 356 have reported insufficient knowledge of health professionals in patient pain management  
6  
7 357 <sup>23,24,36,45</sup>. In this regard, international organizations and specialists stated that improvement the  
8  
9 358 knowledge of the health professionals by providing educational resources is an important factor  
10  
11 359 for appropriate pain management in the NICU <sup>41,46</sup>. Nowadays, pain management is one of the  
12  
13 360 topics of continuing education programs in developed settings. A study cited the use of  
14  
15 361 numerous training forums and seminars as a factor in promoting pain management in US  
16  
17 362 hospitals <sup>24</sup>. In addition, other educational methods have been mentioned in studies that can be  
18  
19 363 used based on the facilities and conditions of each setting. For an example Rajasoorya  
20  
21 364 acknowledge that clinical rounds are a great opportunity to gain knowledge, and if performed  
22  
23 365 well, they can create unique learning opportunities and improve the quality of patient care <sup>47</sup>.  
24  
25  
26  
27  
28  
29 366

## 30 367 **Conclusion**

31  
32  
33 368 Since the challenge of pain management vary depending on the context, the present study  
34  
35 369 indicated the organizational challenges to optimal pain management in an NICU in a  
36  
37 370 developing country. According to the participants' opinions, many organizational factors  
38  
39 371 consistently affected neonatal pain management. These challenges included: culture (e.g., low  
40  
41 372 collaboration and communication between health care team members), lack of organizational  
42  
43 373 protocols and supervision as a formal structure, and inadequate resources such as the lack of  
44  
45 374 time and educational programs.  
46  
47  
48

49 375

## 50 376 **How might this information affect in practice?**

51  
52  
53 377 It seems that new strategies are needed for improving NICU pain management. Promoting  
54  
55 378 interprofessional collaboration as well as parent-care providers' interactions can increase  
56  
57 379 neonatal pain management. Moreover, to achieve optimal pain management, developing and  
58  
59  
60

1  
2  
3 380 implementing an evidence-based pain management protocol is necessary. An integrated  
4  
5 381 clinical performance can be achieved through administrative supervision and frequent auditing.  
6  
7 382 Due to the inadequate knowledge in the health care team, practical training is essential in such  
8  
9  
10 383 areas as control of environmental stimuli, pharmacological and non-pharmacological pain-  
11  
12 384 relieving methods, and using pain assessment tools. Also, heavy workload can decrease the  
13  
14 385 quality of staff performance about the management of neonatal pain. Reducing the workload  
15  
16 386 in health care organizations is complex and multifaceted, but fulfilling the physical and  
17  
18 387 emotional needs of the care team can improve their performance.  
19  
20  
21  
22 388

### 23 24 389 **Acknowledgements**

25  
26 390 We would like to acknowledge all the participants who so willingly gave their time to be  
27  
28 391 interviewed.  
29

### 30 31 392 **Contributorship statement**

32  
33 393 H.N: Conceptualization, Methodology, software, Data Curation, Project administration,  
34  
35 394 Formal analysis, Writing- original draft, Writing-review and editing. H.H: Conceptualization,  
36  
37 395 Methodology, Supervision, Formal analysis, Writing-review and editing. M.J:  
38  
39 396 Conceptualization, Methodology, Validation, Formal analysis, Writing-review and editing.  
40  
41  
42 397 R.N: Methodology, Formal analysis, Validation.  
43

### 44 45 398 **Competing interests**

46  
47 399 None declared.  
48

### 49 50 400 **Funding**

51  
52 401 This study was funded by Tabriz University of Medical Sciences  
53

### 54 55 402 **Data sharing statement**

56  
57 403 Data are available upon reasonable request.  
58

### 59 60 404 **Ethics approval statement**

1  
2  
3 405 The Ethics Committee of Tabriz University of Medical Sciences approved the study (code:  
4  
5 406 IR.TBZMED.REC.1398.985). Participants gave informed consent to participate in the study  
6  
7  
8 407 before taking part.  
9

408

409 **References**

- 10  
11  
12  
13  
14  
15 410 .1 Valeri BO, Holsti L, Linhares MB. Neonatal pain and developmental outcomes in children born  
16 411 preterm: a systematic review. *The Clinical journal of pain*. 2015;31(4):355-362.  
17 412 .2 Walker SM. Neonatal pain. *Pediatric Anesthesia*. 2014;24(1):39-48.  
18 413 .3 International Pain Summit Of The International Association For The Study Of Pain. Declaration  
19 414 of Montréal: declaration that access to pain management is a fundamental human right. *J Pain*  
20 415 *Palliat Care Pharmacother*. 2011;25(1):29-31.  
21 416 .4 De Lima J, Carmo KB. Practical pain management in the neonate. *Best Practice & Research*  
22 417 *Clinical Anaesthesiology*. 2010;24(3):291-307.  
23  
24 418 .5 Carter BS, Brunkhorst J. Neonatal pain management. *Seminars in perinatology*.  
25 419 2017;41(2):111-116.  
26 420 .6 Wallace H, Jones T. Managing procedural pain on the neonatal unit: Do inconsistencies still  
27 421 exist in practice? *Journal of Neonatal Nursing*. 2017;23(3):119-126.  
28 422 .7 Beck SL, Brant JM, Donohue R, et al. Oncology nursing certification: relation to nurses'  
29 423 knowledge and attitudes about pain, patient-reported pain care quality, and pain outcomes.  
30 424 Paper presented at: Oncology nursing forum2016.  
31 425 .8 Brant JM, Mohr C, Coombs NC, Finn S, Wilmarth E. Nurses' knowledge and attitudes about  
32 426 pain: personal and professional characteristics and patient reported pain satisfaction. *Pain*  
33 427 *Management Nursing*. 2017;18(4):214-223.  
34 428 .9 Alley LG. The influence of an organizational pain management policy on nurses' pain  
35 429 management practices. Paper presented at: Oncology Nursing Forum2001.  
36  
37 430 .10 Latimer MA, Ritchie JA, Johnston CC .Individual nurse and organizational context  
38 431 considerations for better knowledge use in pain care. *Journal of pediatric nursing*.  
39 432 2010;25(4):274-281.  
40 433 .11 Losacco V, Cuttini M, Greisen G, et al. Heel blood sampling in European neonatal intensive  
41 434 care units :compliance with pain management guidelines. *Archives of Disease in Childhood-*  
42 435 *Fetal and Neonatal Edition*. 2011;96(1):F65-F68.  
43 436 .12 Stevens B, Riahi S, Cardoso R, et al. The influence of context on pain practices in the NICU:  
44 437 perceptions of health care professionals. *Qualitative Health Research*. 2011;21(6):757-770.  
45 438 .13 Razeq NMA, Akuma AO, Jordan S. Status of neonatal pain assessment and management in  
46 439 Jordan. *Pain Management Nursing*. 2016;17(4):239-248.  
47  
48 440 .14 Cronin P, Coughlan M, Smith V. *Understanding nursing and healthcare research*. Sage; 2014.  
49 441 .15 Lambert SD, Loisel CG. Combining individual interviews and focus groups to enhance data  
50 442 richness. *Journal of advanced nursing*. 2008;62(2):228-237.  
51 443 .16 Graneheim UH, Lundman B. Qualitative content analysis in nursing research: concepts,  
52 444 procedures and measures to achieve trustworthiness. *Nurse education today*. 2004;24(2):105-  
53 445 112.  
54 446 .17 Lincoln YS, Guba EG. *Naturalistic inquiry*. Newbury Park, CA: Sage; 1985.  
55 447 .18 O'Daniel M, Rosenstein AH. Professional communication and team collaboration. *Patient*  
56 448 *safety and quality: An evidence-based handbook for nurses*. 2008.

1  
2  
3  
4  
5  
6  
7  
8  
9  
10  
11  
12  
13  
14  
15  
16  
17  
18  
19  
20  
21  
22  
23  
24  
25  
26  
27  
28  
29  
30  
31  
32  
33  
34  
35  
36  
37  
38  
39  
40  
41  
42  
43  
44  
45  
46  
47  
48  
49  
50  
51  
52  
53  
54  
55  
56  
57  
58  
59  
60

- 449 .19 Schneider D. Informal Interactions, Gender, and Hierarchy: Barriers to Nurse-Physician Collaboration in a West Coast Hospital. 2015.
- 450
- 451 .20 Mirlashari J, Brown H, Fomani FK, de Salaberry J, Zadeh TK, Khoshkhou F. The challenges of implementing family-centered care in NICU from the perspectives of physicians and nurses. *Journal of pediatric nursing*. 2020;50:e91-e98.
- 452
- 453
- 454 .21 Balice-Bourgeois C, Zumstein-Shaha M, Vanoni F, Jaques C, Newman CJ, Simonetti GD. A systematic review of clinical practice guidelines for acute procedural pain on neonates. *The Clinical journal of pain*. 2020;36(5):390-398.
- 455
- 456
- 457 .22 Balice-Bourgeois C, Zumstein-Shaha M, Simonetti GD, Newman CJ. Interprofessional collaboration and involvement of parents in the management of painful procedures in newborns. *Frontiers in Pediatrics*. 2020;8.
- 458
- 459
- 460 .23 Razeq NMA. Barriers that impede the provision of pain care to neonates by nurses in Jordan. *Journal of Obstetric, Gynecologic & Neonatal Nursing*. 2016;45(3):371-377.
- 461
- 462 .24 Tavernier SS, Guo J-W, Eaton J, Brant JM, Berry P, Beck SL. Context matters for nurses leading pain improvement in US hospitals. *Pain Management Nursing*. 2018;19(5):474-486.
- 463
- 464 .25 Vestergaard E, Nørgaard B. Interprofessional collaboration: An exploration of possible prerequisites for successful implementation. *Journal of Interprofessional Care*. 2018;32(2):185-195.
- 465
- 466
- 467 .26 Hassankhani H, Negarandeh R, Abbaszadeh M, Jabraeili M. The role of mothers during painful procedures on neonates: A focused ethnography. *Journal of Neonatal Nursing*. 2020.
- 468
- 469 .27 Khajeh M, Nayeri ND, Bahramnezhad F, Hoseini ASS. Family centered care of hospitalized children: a hybrid concept analysis in Iran. *Health promotion perspectives*. 2017;7(4):210.
- 470
- 471 .28 Axelin A, Anderzén-Carlsson A, Eriksson M, Pölkki T, Korhonen A, Franck LS. Neonatal intensive care nurses' perceptions of parental participation in infant pain management. *The Journal of perinatal & neonatal nursing*. 2015;29(4):363.374-
- 472
- 473
- 474 .29 Cong X, McGrath JM, Delaney C, et al. Neonatal nurses' perceptions of pain management: survey of the United States and China. *Pain Management Nursing*. 2014;15(4):834-844.
- 475
- 476 .30 Morley L, Cashell A. Collaboration in Health Care. *Journal of Medical Imaging and Radiation Sciences*. 2017;48(2):207-216.
- 477
- 478 .31 Axelin A, Lehtonen L, Pelander T, Salanterä S. Mothers' different styles of involvement in preterm infant pain care. *Journal of Obstetric, Gynecologic & Neonatal Nursing*. 2010;39(4):415-424.
- 479
- 480
- 481 .32 Skene C, Franck L, Curtis P, Gerrish K. Parental involvement in neonatal comfort care. *Journal of Obstetric, Gynecologic & Neonatal Nursing*. 2012;41(6):786-797.
- 482
- 483 .33 Lester BM, Hawes K, Abar B, et al. Single-family room care and neurobehavioral and medical outcomes in preterm infants. *Pediatrics*. 2014;134(4):754-760.
- 484
- 485 .34 Franck LS, O'Brien K. The evolution of family-centered care: From supporting parent-delivered interventions to a model of family integrated care. *Birth defects research*. 2019;111(15):1044-1059.
- 486
- 487
- 488 .35 Ponthier L, Ensuque P, Guigonis V, et al. Parental presence during painful or invasive procedures in neonatology: A survey of healthcare professionals. *Archives de Pédiatrie*. 2020;27(7):362-367.
- 489
- 490
- 491 .36 Shirazi ZH, Soltanian M, Sarvestani RS. Relief and care in the shade: A concept extracted from practices of neonatal nurses during pain management. *Nursing Practice Today*. 2020;7(in press):X-X.
- 492
- 493
- 494 .37 Querido DL, Christoffel MM, Machado MED, de Almeida VS, dos Santos Esteves APV, de Carvalho Matos PB. Perceptions of professionals on neonatal pain: a descriptive study. *Online Brazilian Journal of Nursing*. 2017;16(4):420-430.
- 495
- 496
- 497 .38 Batiha A-M. Pain management barriers in critical care units: A qualitative study. *International Journal of Advanced Nursing Studies*.1:(1)3;2014 .
- 498

- 1  
2  
3 499 .39 Gradin M, Eriksson M, Group Ni. Neonatal pain assessment in Sweden—a fifteen-year follow  
4 500 up. *Acta paediatrica*. 2011;100(2):204-208.  
5 501 .40 Spence K, Henderson-Smart D. Closing the evidence-practice gap for newborn pain using  
6 502 clinical networks. *Journal of paediatrics and child health*. 2011;47(3):92-98.  
7 503 .41 American Academy of Pediatrics. Prevention and Management of Procedural Pain in the  
8 504 Neonate: An Update. *Pediatrics*. 2016;137(2):e20154271.  
9 505 .42 Stevens BJ, Yamada J, Estabrooks CA, et al .Pain in hospitalized children: effect of a  
10 506 multidimensional knowledge translation strategy on pain process and clinical outcomes.  
11 507 *PAIN®*. 2014;155(1):60-68.  
12 508 .43 Mehrnoush N, Ashktorab T. Pain Management Perceptions of the Neonatal Nurses in NICUs  
13 509 and Neonatal Units in Ardebil, Iran. *Iranian Journal of Neonatology IJN*. 2016;7(4):23-29.  
14 510 .44 Twycross A. Nurses' views about the barriers and facilitators to effective management of  
15 511 pediatric pain. *Pain Management Nursing*. 2013;14(4):e164-e172.  
16 512 .45 Peng NH, Lee MC, Su WL, et al. Knowledge, attitudes and practices of neonatal professionals  
17 513 regarding pain management. *European Journal of Pediatrics*. 2020.  
18 514 .46 Hall RW, Anand KJ. Pain management in newborns. *Clinics in perinatology*. 2014;41(4):895-  
19 515 924.  
20 516 .47 Rajasoorya C. Clinical ward rounds-challenges and opportunities. *Ann Acad Med Singapore*.  
21 517 2016;45(4):152-156.



## COREQ (CONsolidated criteria for REporting Qualitative research) Checklist

A checklist of items that should be included in reports of qualitative research. You must report the page number in your manuscript where you consider each of the items listed in this checklist. If you have not included this information, either revise your manuscript accordingly before submitting or note N/A.

| Topic                                          | Item No. | Guide Questions/Description                                                                                                                              | Reported on Page No. |
|------------------------------------------------|----------|----------------------------------------------------------------------------------------------------------------------------------------------------------|----------------------|
| <b>Domain 1: Research team and reflexivity</b> |          |                                                                                                                                                          |                      |
| <i>Personal characteristics</i>                |          |                                                                                                                                                          |                      |
| Interviewer/facilitator                        | 1        | Which author/s conducted the interview or focus group?                                                                                                   |                      |
| Credentials                                    | 2        | What were the researcher's credentials? E.g. PhD, MD                                                                                                     |                      |
| Occupation                                     | 3        | What was their occupation at the time of the study?                                                                                                      |                      |
| Gender                                         | 4        | Was the researcher male or female?                                                                                                                       |                      |
| Experience and training                        | 5        | What experience or training did the researcher have?                                                                                                     |                      |
| <i>Relationship with participants</i>          |          |                                                                                                                                                          |                      |
| Relationship established                       | 6        | Was a relationship established prior to study commencement?                                                                                              |                      |
| Participant knowledge of the interviewer       | 7        | What did the participants know about the researcher? e.g. personal goals, reasons for doing the research                                                 |                      |
| Interviewer characteristics                    | 8        | What characteristics were reported about the interviewer/facilitator? e.g. Bias, assumptions, reasons and interests in the research topic                |                      |
| <b>Domain 2: Study design</b>                  |          |                                                                                                                                                          |                      |
| <i>Theoretical framework</i>                   |          |                                                                                                                                                          |                      |
| Methodological orientation and Theory          | 9        | What methodological orientation was stated to underpin the study? e.g. grounded theory, discourse analysis, ethnography, phenomenology, content analysis |                      |
| <i>Participant selection</i>                   |          |                                                                                                                                                          |                      |
| Sampling                                       | 10       | How were participants selected? e.g. purposive, convenience, consecutive, snowball                                                                       |                      |
| Method of approach                             | 11       | How were participants approached? e.g. face-to-face, telephone, mail, email                                                                              |                      |
| Sample size                                    | 12       | How many participants were in the study?                                                                                                                 |                      |
| Non-participation                              | 13       | How many people refused to participate or dropped out? Reasons?                                                                                          |                      |
| <i>Setting</i>                                 |          |                                                                                                                                                          |                      |
| Setting of data collection                     | 14       | Where was the data collected? e.g. home, clinic, workplace                                                                                               |                      |
| Presence of non-participants                   | 15       | Was anyone else present besides the participants and researchers?                                                                                        |                      |
| Description of sample                          | 16       | What are the important characteristics of the sample? e.g. demographic data, date                                                                        |                      |
| <i>Data collection</i>                         |          |                                                                                                                                                          |                      |
| Interview guide                                | 17       | Were questions, prompts, guides provided by the authors? Was it pilot tested?                                                                            |                      |
| Repeat interviews                              | 18       | Were repeat interviews carried out? If yes, how many?                                                                                                    |                      |
| Audio/visual recording                         | 19       | Did the research use audio or visual recording to collect the data?                                                                                      |                      |
| Field notes                                    | 20       | Were field notes made during and/or after the interview or focus group?                                                                                  |                      |
| Duration                                       | 21       | What was the duration of the interviews or focus group?                                                                                                  |                      |
| Data saturation                                | 22       | Was data saturation discussed?                                                                                                                           |                      |
| Transcripts returned                           | 23       | Were transcripts returned to participants for comment and/or                                                                                             |                      |

| Topic                                  | Item No. | Guide Questions/Description                                                                                                        | Reported on Page No. |
|----------------------------------------|----------|------------------------------------------------------------------------------------------------------------------------------------|----------------------|
|                                        |          | correction?                                                                                                                        |                      |
| <b>Domain 3: analysis and findings</b> |          |                                                                                                                                    |                      |
| <i>Data analysis</i>                   |          |                                                                                                                                    |                      |
| Number of data coders                  | 24       | How many data coders coded the data?                                                                                               |                      |
| Description of the coding tree         | 25       | Did authors provide a description of the coding tree?                                                                              |                      |
| Derivation of themes                   | 26       | Were themes identified in advance or derived from the data?                                                                        |                      |
| Software                               | 27       | What software, if applicable, was used to manage the data?                                                                         |                      |
| Participant checking                   | 28       | Did participants provide feedback on the findings?                                                                                 |                      |
| <i>Reporting</i>                       |          |                                                                                                                                    |                      |
| Quotations presented                   | 29       | Were participant quotations presented to illustrate the themes/findings?<br>Was each quotation identified? e.g. participant number |                      |
| Data and findings consistent           | 30       | Was there consistency between the data presented and the findings?                                                                 |                      |
| Clarity of major themes                | 31       | Were major themes clearly presented in the findings?                                                                               |                      |
| Clarity of minor themes                | 32       | Is there a description of diverse cases or discussion of minor themes?                                                             |                      |

Developed from: Tong A, Sainsbury P, Craig J. Consolidated criteria for reporting qualitative research (COREQ): a 32-item checklist for interviews and focus groups. *International Journal for Quality in Health Care*. 2007. Volume 19, Number 6: pp. 349 – 357

**Once you have completed this checklist, please save a copy and upload it as part of your submission. DO NOT include this checklist as part of the main manuscript document. It must be uploaded as a separate file.**

# BMJ Open

## Organizational Challenges of Pain Management in Neonatal Intensive Care Unit: A Qualitative Study

|                                 |                                                                                                                                                                                                                                          |
|---------------------------------|------------------------------------------------------------------------------------------------------------------------------------------------------------------------------------------------------------------------------------------|
| Journal:                        | <i>BMJ Open</i>                                                                                                                                                                                                                          |
| Manuscript ID                   | bmjopen-2023-072695.R1                                                                                                                                                                                                                   |
| Article Type:                   | Original research                                                                                                                                                                                                                        |
| Date Submitted by the Author:   | 20-May-2023                                                                                                                                                                                                                              |
| Complete List of Authors:       | neshat, hanieh; Tabriz University of Medical Sciences<br>hassankhani, hadi; Tabriz University of Medical Sciences<br>jabraeili, mahnaz; Tabriz University of Medical Sciences<br>Negarandeh, Reza; Tehran University of Medical Sciences |
| <b>Primary Subject Heading</b>: | Nursing                                                                                                                                                                                                                                  |
| Secondary Subject Heading:      | Paediatrics                                                                                                                                                                                                                              |
| Keywords:                       | Neonatal intensive & critical care < INTENSIVE & CRITICAL CARE, PAIN MANAGEMENT, Organisation of health services < HEALTH SERVICES ADMINISTRATION & MANAGEMENT, QUALITATIVE RESEARCH                                                     |
|                                 |                                                                                                                                                                                                                                          |

SCHOLARONE™  
Manuscripts

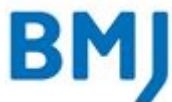

I, the Submitting Author has the right to grant and does grant on behalf of all authors of the Work (as defined in the below author licence), an exclusive licence and/or a non-exclusive licence for contributions from authors who are: i) UK Crown employees; ii) where BMJ has agreed a CC-BY licence shall apply, and/or iii) in accordance with the terms applicable for US Federal Government officers or employees acting as part of their official duties; on a worldwide, perpetual, irrevocable, royalty-free basis to BMJ Publishing Group Ltd ("BMJ") its licensees and where the relevant Journal is co-owned by BMJ to the co-owners of the Journal, to publish the Work in this journal and any other BMJ products and to exploit all rights, as set out in our [licence](#).

The Submitting Author accepts and understands that any supply made under these terms is made by BMJ to the Submitting Author unless you are acting as an employee on behalf of your employer or a postgraduate student of an affiliated institution which is paying any applicable article publishing charge ("APC") for Open Access articles. Where the Submitting Author wishes to make the Work available on an Open Access basis (and intends to pay the relevant APC), the terms of reuse of such Open Access shall be governed by a Creative Commons licence – details of these licences and which [Creative Commons](#) licence will apply to this Work are set out in our licence referred to above.

Other than as permitted in any relevant BMJ Author's Self Archiving Policies, I confirm this Work has not been accepted for publication elsewhere, is not being considered for publication elsewhere and does not duplicate material already published. I confirm all authors consent to publication of this Work and authorise the granting of this licence.

1  
2  
3 1 **Title**

4  
5 2 Organizational Challenges of Pain Management in Neonatal Intensive Care Unit: A Qualitative  
6  
7  
8 3 Study

9  
10 4 **Author information**

11  
12 5 **Hanieh Neshat**; RN, MSc, BSc

13  
14  
15 6 PhD in nursing, Pediatric Health Research center, Tabriz University of Medical Sciences,  
16  
17 7 Tabriz, Iran

18  
19 8 Faculty of Nursing and Midwifery, Tabriz University of Medical Sciences, Tabriz, Iran,

20  
21 9 ORCID: 0000-0003-1359-6467

22  
23  
24 10 **Hadi Hassankhani**; RN, PhD, MSc, BSc

25  
26 11 Professor in Nursing, Department of Medical and Surgical Nursing, Faculty of Nursing and  
27  
28 12 Midwifery, Tabriz University of Medical Sciences, Tabriz, Iran

29  
30 13 ORCID: 0000-0001-7620-6425

31  
32  
33 14 **Mahnaz Jabraeili**; RN, PhD, MSc, BSc

34  
35 15 Assistant Professor in Nursing, Department of pediatrics, Faculty of Nursing and Midwifery,  
36  
37 16 Tabriz University of Medical Sciences, Tabriz, Iran

38  
39 17 ORCID: 0000-0002-4035-1433

40  
41  
42 18 **Reza Negarandeh**; RN, PhD, MSc, BSc

43  
44 19 Professor in Nursing, Nursing and Midwifery Care Research Center, School of Nursing and  
45  
46 20 Midwifery, Tehran University of Medical Sciences, Tehran, Iran

47  
48 21 ORCID: 0000-0002-7597-5094. [negarandeh@gmail.com](mailto:negarandeh@gmail.com)

49  
50  
51 22 **Corresponding author**: Hadi Hassankhani, School of Nursing and Midwifery, Tabriz  
52  
53 23 University of Medical Sciences, Tabriz, Iran. E-mail: [hanie.neshat@yahoo.com](mailto:hanie.neshat@yahoo.com)

54  
55 24 Tel: +98-9183181267

56  
57  
58 25

1  
2  
3 26 **Organizational Challenges of Pain Management in Neonatal Intensive Care Unit: A**  
4  
5 27 **Qualitative Study**  
6  
7  
8 28

9  
10 29 **Abstract**

11  
12 30 **Objectives:** Despite credible evidence, managing neonates' pain in the neonatal intensive care  
13  
14 31 unit is a challenging issue. In this regard, the organizational context is an important factor. The  
15  
16 32 existing challenges vary depending on the context and investigating them can help to improve  
17  
18 33 the quality of services. The study aimed to explore organizational challenges to neonates' pain  
19  
20 34 management in the neonatal intensive care unit.

21  
22 35 **Methods:** This qualitative study included 31 nurses and physicians in the neonatal intensive  
23  
24 36 care unit of Children's Hospital, Tabriz, Iran. Data collection was done through individual and  
25  
26 37 focus group interviews. For data analysis, we used conventional content analysis.

27  
28 38 **Results:** The identified challenges included organizational culture (poor interprofessional  
29  
30 39 collaboration and low parental participation), organizational structure (lack of unified approach  
31  
32 40 in relieving pain and limited supervision for pain management), and organizational resources  
33  
34 41 (lack of time due to high workload and inadequate educational programs).

35  
36 42 **Conclusions:** Many organizational factors consistently affect the neonatal pain management.  
37  
38 43 Adopting some approaches to enhance the cooperation of treatment team members, holding  
39  
40 44 educational programs, proper organizational supervision, and implementing a unified neonatal-  
41  
42 45 based pain management program could improve neonatal pain management.  
43  
44 46

45  
46  
47 47 **Strengths and limitations**

48 48 Strengths are:  
49  
50  
51  
52  
53  
54  
55  
56  
57  
58  
59  
60

- 1  
2  
3 49 • The exclusive focus on the organizational challenges of neonatal pain management in  
4  
5 50 the clinical setting of developing country, which has been less addressed in other  
6  
7  
8 51 studies.  
9  
10 52 • The inclusion of a range of health professionals across different caring situations,  
11  
12 53 educational levels, and work experiences.  
13  
14 54 • Triangulation in data collection (individual interviews and focus groups) which  
15  
16 55 increases the trustworthiness of the findings.  
17  
18

19 56 Limitations are:

- 20  
21  
22 57 • Sampling of single NICU and lack of organizational diversity.  
23  
24 58 • Potential for missing some information due to the hierarchical nature of the setting that  
25  
26 59 discourage the voicing of opinions.  
27  
28  
29  
30

## 31 **Background**

32  
33 62 Nowadays, the survival rate of neonates admitted to the neonatal intensive care unit (NICU)  
34  
35 63 has increased. Therefore, it is essential to optimize the NICU care and reduce the complications  
36  
37 64 of survived cases. In this regard, proper neonates' pain control is a priority. Despite the  
38  
39 65 misconceptions in the past, scientists have proved the neonates' perception of pain in recent  
40  
41 66 decades <sup>1</sup>.  
42  
43  
44

45 67 Pain can increase the demand in the cardiovascular system and endanger the hemodynamic  
46  
47 68 status of the neonate by increasing the heart rate and decreasing the arterial oxygen saturation.  
48  
49 69 It also increases the risk of intraventricular hemorrhage by increasing blood pressure in the  
50  
51 70 germinal matrix. The weak immune system and increased risk of infections are other problems  
52  
53 71 related to pain tolerance in neonates. Anxiety, abnormalities in processing pain (hypo- or hyper  
54  
55 72 sensitivity to pain), and developmental problems are some long-term effects of inappropriate  
56  
57 73 pain management in neonates <sup>2</sup>. Studies show that the prevention of pain in the neonate is not  
58  
59  
60

1  
2  
3 74 only ethically essential, but it is also necessary for preventing short-term and long-term  
4  
5 75 complications and developmental disorders in neonates<sup>3,4</sup>.

6  
7  
8 76 Although there have been theoretical advances and clinical guidelines related to pain  
9  
10 77 management in the NICU, it is still a severe challenge in complex care conditions <sup>5</sup> and needs  
11  
12 78 further research <sup>6</sup>. Evidence suggests that the rate of routine pain assessment in NICU can be  
13  
14 79 as low as 6-10% <sup>7,8</sup> and only 7.1% of care providers always take interventions to reduce  
15  
16 80 neonates' pain <sup>9</sup>.

17  
18  
19 81 Pain management of neonates is one of the most important caring tasks of care providers.  
20  
21 82 Especially nurses, play a significant role in pain management due to spending more time at the  
22  
23 83 patient's bedside <sup>10</sup>. According to previous studies, the lack of knowledge in care providers is  
24  
25 84 the significant barriers to optimal pain management<sup>11,12</sup>. The evidence shows that the  
26  
27 85 knowledge of care providers and their perceived responsibility for managing pain is  
28  
29 86 significantly related to the organization's policies <sup>13</sup>. Nowadays, health care accreditation  
30  
31 87 centers consider the optimal management of pain as one of the indicators for evaluating the  
32  
33 88 quality of care. They extend patient pain management from an individual issue to an  
34  
35 89 organizational issue and emphasize the importance of the organization in providing safe care.  
36  
37 90 Hence, the researchers are trying to understand the role of organization in this area <sup>14</sup>.

38  
39  
40 91 Evidence suggests that differences in service quality may be due to organizational differences  
41  
42 92 <sup>15</sup>. In this regard, a study examined the role of organizational factors (culture, structure,  
43  
44 93 resources, capabilities, skills, and policies) in the NICU pain management of a developed  
45  
46 94 country and discussed the existing challenges <sup>16</sup>. However, there is a belief that the NICU  
47  
48 95 context in developed countries may be different from developing countries, leading to different  
49  
50 96 pain management challenges in them <sup>17</sup>.

51  
52  
53 97 Although some studies have evaluated pain management in the NICU, limited studies have  
54  
55 98 focused on organizational challenges in developing countries. Accordingly, the present



1  
2  
3 99 descriptive qualitative study aimed to investigate the organizational challenges of NICU pain  
4  
5  
6 100 management in Tabriz, Iran.  
7  
8 101

9  
10 102 **Methods**

11  
12 103 Interpretive descriptive method was used to evaluate the perceptions of health professionals  
13  
14 104 on organizational pain management challenges in the NICU. Descriptive qualitative research  
15  
16  
17 105 helps to describe or discover a phenomenon or a problem, and the researcher can use it to  
18  
19 106 examine a wide range of topics related to people's experiences, perceptions, and perspectives  
20  
21 107 <sup>18</sup>.  
22  
23  
24 108

25  
26 109 **Ethical Considerations**

27  
28 110 The Ethics Committee of Tabriz University of Medical Sciences approved the study (code:  
29  
30 111 IR.TBZMED.REC.1398.985). The first author went to the NICU and explained the purpose of  
31  
32  
33 112 the research to the NICU staff (nurses and physicians), and answered their questions. She also  
34  
35 113 informed them about the voluntary nature of the participation, their right to privacy and  
36  
37 114 confidentiality. All participants were assured that they could withdraw from the study at any  
38  
39 115 time without giving any reason. Then, staff were asked to participate in the study by the first  
40  
41 116 author. Volunteered participants received, and studied written information. They completed the  
42  
43 117 consent form and also expressed their willingness to participate in the individual or focus  
44  
45 118 interviews. The interviews were voice-recorded after obtaining the participants' consent. The  
46  
47 119 place and time of the interview were chosen according to the participants' preference and their  
48  
49 120 privacy was respected during the interview  
50  
51  
52  
53  
54 121

55  
56 122 **Setting and Participants**

57  
58 123  
59  
60

124 The study was conducted in a NICU (level III) in Tabriz, East Azerbaijan province in the  
 125 northwest of Iran. The NICU was a referral center for term and preterm neonates with various  
 126 medical and surgical disease. The physical space of the NICU included three large halls  
 127 equipped with 27 warmers. The average ratio of nurse to patient was 1:3. In this ward, different  
 128 types of painful interventions are performed according to the neonates' needs. The ward has a  
 129 special accommodation for mothers, which includes kitchen, toilet, bathroom and a large hall  
 130 with multiple beds and wardrobes. Mothers can stay in the ward and with their infant 24 hours  
 131 a day. The participants included 26 nurses and 5 physicians (Table1).

132 Table 1. Demographic Characteristics of Participants

| Participants (N=31) | Age (Year) | Marital status Married/Single | Educational status                             | Organizational position                                                       | Work experience (Year) |
|---------------------|------------|-------------------------------|------------------------------------------------|-------------------------------------------------------------------------------|------------------------|
| Nurse (N=26)        | 30-44      | 23 / 3                        | MSc =1<br>BSc =25                              | Clinical Supervisor=1<br>Educational Supervisor=1<br>Head Nurse=2<br>Nurse=22 | 5-20                   |
| Physician (N=5)     | 35-48      | 5 / 0                         | Neonatologist=4<br>Fellowship of neonatology=1 | Academic Member=2<br>Clinical Physician=2<br>Assistant=1                      | 4-18                   |

133  
 134 The purposive sampling was used to achieve the maximum variation. For this purpose, we  
 135 selected the interested participants (nurses and physician) with various age range, educational  
 136 level, work experience, organizational position, and profession for either individual or focus  
 137 interviews.

138

### 139 **Data Collection**

140 Data were collected from February 2021 to January 2022 through 11 individual interviews and  
 141 three focus group discussions with 7-, 8-, and 5-participants, respectively. The individual

1  
2  
3 142 interviews lasted an average of 42 minutes and were performed in the coffee room, according  
4  
5 143 to the preference of the participants. The first author, who had a clinical and research  
6  
7 144 background in neonatal care, led the individual interviews. She used a semi-structured  
8  
9 145 interview guide that focused on participants' experiences of neonatal pain management in  
10  
11 146 NICU (Table 2).  
12  
13  
14  
15 147  
16  
17 148 Table 2. Interview Guide  
18

19 Main questions:

20  
21 It's very valuable for me to know about your experiences of managing infant pain in your  
22  
23 NICU. Please talk about them if you wish.  
24

25  
26 What are health care services provided to manage the infant pain in your NICU?  
27

28  
29 What are the problems in managing infant pain in your NICU?  
30

31  
32 What organizational factors are effective in managing the neonatal pain?  
33

34 Probing questions:

35  
36 Could you explain more?  
37

38  
39 What do you mean?  
40

41  
42 Can you give an example to clarify further?  
43

44  
45 149 In order to achieve a broader and richer range of information when no new information  
46  
47 150 emerged of the individual interviews, three focus groups were conducted by the first author in  
48  
49 151 a conference hall of the center. Integrating individual and focus interviews makes a productive  
50  
51 152 process and enriches data to conceptualize the phenomenon<sup>19</sup>. The focus group sessions began  
52  
53 153 by providing information about the study, and the questions asked were similar to the individual  
54  
55 154 interviews. The first author handled the focus groups.  
56  
57  
58  
59 156  
60

1  
2  
3 **157 Patient and public involvement**  
4

5 158 No patient involved.  
6

7  
8 **159 Data Analysis**  
9

10 160 Conventional content analysis was used to interpret the transcripts. In this approach, inductive  
11  
12 161 codes, sub-themes, and themes emerged from the transcripts. We used Graneheim and  
13  
14 162 Lundman algorithms to analyze the data <sup>20</sup>. MAXQDA10 software was used for data analysis.  
15  
16  
17 163 The data analysis steps were presented in Table 3.  
18

19 164 Table 3. The Steps of Data Analysis  
20

21  
22 A- The first author transcribed each interview and read it several times to obtain a  
23  
24 comprehensive view.  
25

26 B- Sentences, and paragraphs considered as the meaning units were condensed  
27  
28 according to their content.  
29

30 C- The condensed meaning units were abstracted and labeled with codes (852 codes).  
31

32 D- A group of 4 researchers (HN, HH, MJ, and RN) reviewed and discussed condensed  
33  
34 meaning units and codes once more to resolve any conflicts that may exist in the  
35  
36 concept of one code or any possible similarities in several codes.  
37  
38

39 E- They sorted the codes based on their similarities and differences to sub-themes.  
40  
41

42 F- Finally, themes were formulated from the classification of sub-themes.  
43  
44

45 165

46  
47 166  
48

49 **167 Trustworthiness**  
50

51 168 We used Guba and Lincoln's criteria to assess trustworthiness <sup>21</sup>. Credibility was enhanced  
52  
53 169 through purposive sampling with the principle of maximum variation to select the participants.  
54  
55  
56 170 In addition to individual interviews, we used focus groups to collect data. Also, to verify the  
57  
58 171 data and the extracted codes, the member check was used. The researchers were familiar with  
59  
60

172 the NICU department, and they were experienced in qualitative research. For the study's  
 173 dependability, we tried to clearly describe the research steps taken from the beginning of the  
 174 research project to the development and reporting of findings. We also used the probing  
 175 questions to increase dependability. In addition, the process of data collection and findings  
 176 were audited by experts, which helped promote confirmability.

177

## 178 **Results**

179 Three main themes and six sub-themes that explained the organizational challenges to optimal  
 180 neonates' pain management in the NICU were identified (Table 4).

181 Table 4. Themes and Sub-themes

| Themes                   | Sub-themes                              |
|--------------------------|-----------------------------------------|
| Organizational culture   | Poor interprofessional collaboration    |
|                          | Low parental participation              |
| Organizational structure | Lack of unified approach to pain relief |
|                          | Limited supervision for pain management |
| Organizational resources | Lack of time due to high workload       |
|                          | Inadequate educational programs         |

182

### 183 **Organizational Culture**

#### 184 *Poor interprofessional collaboration*

185 According to the participants, individual decision-making on doing tasks and poor coordination  
 186 among team members led to such problems as repetitive manipulations of the neonates,  
 187 disorganization, and limited opportunities to relieve the neonates' pain. Also, the staff did not  
 188 talk to each other about the pain management of the neonates and no suggestions were  
 189 exchanged between them. Although the nurses talked to physicians about the need to control

1  
2  
3 190 neonates' pain and made suggestions in some cases, they were usually dismissed by the  
4  
5 191 physicians because they had more decision-making power.  
6  
7

8 192

9  
10 193 *"Staff just want to do their job. For example, the doctor comes and says: 'I want to do an LP*  
11  
12 194 *on the infant.' Without coordinating the things related to managing the neonate's pain with the*  
13  
14 195 *nurse!"* (Participant 3)  
15  
16

17 196

### 18 19 20 197 *Low parental participation*

21  
22 198 Although the parents were present in the ward, they were not considered as the members of the  
23  
24 199 care team, and were not often consulted. The participants believed that the staff was usually  
25  
26 200 controlling the parents, and the parents acted according to the staff's wishes. Usually, parents  
27  
28 201 are given limited information about their neonate's pain and how to participate and relieve it.  
29  
30 202 This led to a one-way and non-interactive relationship between family and the staff. As a result,  
31  
32 203 they were unable to play a fully effective role in activities such as relieving their neonate's  
33  
34 204 pain.  
35  
36  
37

38 205

39  
40 206 *"In our ward, usually we do not involve the parents in controlling the baby's pain. Most of the*  
41  
42 207 *times, the staff asks the parents to go out and come back after managing the neonate's pain.*  
43  
44 208 *This is a quite acceptable behavior in the ward."* (Participant 21)  
45  
46

47 209

### 48 49 50 210 **Organizational structure**

#### 51 211 *Lack of unified approach in relieving pain*

52  
53 212 According to the participants, there were no predefined and specific policy for pain control in  
54  
55 213 the ward. As a result, no positive atmosphere and clear expectations in terms of pain-relieving  
56  
57  
58  
59  
60

1  
2  
3 214 actions were created. This caused a lack of strong support for the implementation of evidence  
4  
5 215 in practice. Although several health care professionals working in the NICU did things to  
6  
7 216 relieve the neonates' pain based on their personal preference, credible pain assessment tools  
8  
9  
10 217 and pain prevention and management policies were not used abundantly. Thus, there were  
11  
12 218 disagreements and arbitrary pain management in the ward. The participants believed that  
13  
14 219 introduction of specific protocols could help to improve outcomes and develop optimal pain  
15  
16 220 management practices in the NICU, leading to the uniformity of the performance among  
17  
18 221 different professions and clinicians.  
19  
20  
21  
22

23  
24 223 *“Currently, it is not clear what we should do to control the pain in different situations. For*  
25  
26 224 *example, we don't know what exactly to do to control the pain of a neonate after surgery. The*  
27  
28 225 *internal medicine and surgery team members have different opinions on this issue, and their*  
29  
30 226 *lack of understanding sometimes causes the neonate not to be given painkillers at all.”*  
31  
32  
33 227 (Participant 1)  
34  
35  
36

37  
38 229 *“We have different neonatologists with different methods of practicing; some of them prescribe*  
39  
40 230 *painkillers more commonly than others. Perhaps we could have some predefined instructions*  
41  
42 231 *for a variety of methods or painful pain management because some care-providers might think*  
43  
44 232 *that a specific method is not very painful.”* (Participant 13)  
45  
46  
47

48  
49 234 *Limited supervision for pain management*  
50  
51 235 There is little demand from the organization regarding the neonatal pain management. Also,  
52  
53 236 the staff's performance regarding neonatal pain management is not supervised. The participants  
54  
55 237 explained that the Hospital Quality Assurance Committee had no policies on assessing the  
56  
57 238 quality of neonatal pain management. Also, the patients' pain management was not explicitly  
58  
59  
60

1  
2  
3 239 mentioned in the job description of the staff, and the neonates' pain management was not  
4  
5 240 examined in the monthly and annual performance evaluations of the staff. Thus, the  
6  
7  
8 241 performance of health professionals regarding the use of analgesics was not often questioned.  
9  
10 242 However, in some cases, verbal warning were delivered to some health professionals highly  
11  
12 243 inattentive to the patients' pain. Furthermore, there were no clear policies to encourage health  
13  
14 244 professionals who performed well in managing the neonates' pain. Accordingly, appropriate  
15  
16 245 management of the neonates' pain was not considered a professional value.  
17  
18  
19 246

20  
21 247 *“Nobody asks staff about the quality of their performance in relieving infant's pain. We feel*  
22  
23 248 *we're not evaluated or monitored in this regard; and we are completely free to do it or not.”*  
24  
25  
26 249 (Participant 10)  
27

28 250

## 251 **Organizational Resources**

### 252 *Lack of time due to high workload*

253 According to the participants, a high workload was another challenge to appropriate pain  
254 management in the NICU. In most cases, the health professionals did not have a good  
255 performance in relieving the neonates' pain due to lack of time and work overload. Care-  
256 providers mentioned the large number of patients as a challenge for pain management. They  
257 believed that high workload resulted in limited attention to the neonates' pain and not using  
258 analgesics before the procedures. Also, some nurses believed that less pain during the  
259 procedure required two nurses, but the lack of time made it impossible for them to help their  
260 colleagues during the painful procedure.

261



1  
2  
3 262 “A nurse with three patients may admit another one. This workload makes pain management  
4  
5 263 difficult. She/he only thinks of doing their duties quickly and finishing the shift.” (Participant  
6  
7  
8 264 25)

9  
10 265  
11  
12 266 *Inadequate educational program*

13  
14 267 According to the participants, the lack of effective training programs and consequently  
15  
16 268 insufficient knowledge caused the staff not to know the benefits and importance of controlling  
17  
18 269 the neonates’ pain. Some of the educational needs mentioned by the participants included  
19  
20 270 gaining knowledge and skills in using pain assessment tools and pain management techniques  
21  
22 271 appropriate for different situations and procedures, as well as using analgesics. From the  
23  
24 272 participants’ point of view, attending in-service training courses for managing the neonates’  
25  
26 273 pain and participation in research projects or quality improvement activities could increase the  
27  
28 274 health professionals’ awareness of the neonates’ pain and its treatment benefits.  
29  
30  
31  
32

33 275  
34  
35  
36 276 “There is no training program for the NICU staff about the importance and methods of  
37  
38 277 relieving pain in neonates. Since the treatment team members know little about this issue, we  
39  
40 278 should not expect them to perform well.” (Participant 24)  
41  
42  
43

44 279

## 47 280 **Discussion**

48  
49 281 According to our results, organizational factors, including cultural, structural, and resource  
50  
51 282 issues, can affect the optimal control of neonates’ pain in the NICU.

52  
53 283 Organizational culture is the model of group’s prevalent assumptions, which develops through  
54  
55 284 a shared history, experiences, and learning<sup>16</sup>. The health professionals who participated in our  
56  
57 285 study believed that the low participatory culture and poor collaboration of health team members  
58  
59  
60

1  
2  
3 286 threatened the optimal management of the neonates' pain. This issue has caused such problems  
4  
5 287 as over-stimulation of the neonates, inconsistencies in providing services, and losing  
6  
7 288 opportunities in relieving the pain. Interprofessional collaboration is a way in which different  
8  
9  
10 289 health care professionals interact with each other to make clinical decisions after considering  
11  
12 290 each other's knowledge. In this way, the specialists undertake complementary roles and get  
13  
14 291 involved in problem-solving and decision-making processes to develop and implement patient  
15  
16 292 care programs<sup>22</sup>. Participants in the study cited the hierarchical nature and clinical dominance  
17  
18 293 of physicians over nurses as a barrier to appropriate collaboration. Power imbalances in clinical  
19  
20 294 practice are a key barrier to joint decision-making, which can affect the quality of care<sup>23</sup>. The  
21  
22 295 findings of our study are supported by the other literature. Mirlashari et al. showed that the  
23  
24 296 power imbalance between physicians and nurses in Iranian NICUs leads to insufficient team  
25  
26 297 collaboration in providing care<sup>24</sup>. In studies conducted in developed countries, proper  
27  
28 298 communication and interprofessional collaboration in complex care settings such as the NICU  
29  
30 299 was considered the vital element of effective practice on pain<sup>16,25,26</sup>. According to studies,  
31  
32 300 finding communication channels between the health care members can reduce power  
33  
34 301 imbalance and improve their ability to negotiate about pain management approaches<sup>27</sup>. In  
35  
36 302 contrast of our study finding, Tavernier et al. identified team collaboration as a contextual  
37  
38 303 factor to optimal pain management in U.S. hospitals. They acknowledged that interprofessional  
39  
40 304 educational programs have improved communication between the disciplines and supported  
41  
42 305 collaborative relationships<sup>28</sup>. This strategy can be used in countries such as Iran, where  
43  
44 306 insufficient communication and collaboration of health professionals is considered as a  
45  
46 307 challenge in the quality of care. The users of educational programs of Iranian health institutions  
47  
48 308 are traditionally all from the same discipline. Also, evidence-based strategies, such as  
49  
50 309 interprofessional practice teams, can improve the interprofessional collaboration<sup>29</sup>.  
51  
52  
53  
54  
55  
56  
57  
58  
59  
60

1  
2  
3 310 The findings of this study indicate insufficient parent-health professional collaboration in the  
4  
5 311 neonates' pain management. Organizational culture did not adequately support parental  
6  
7 312 involvement, and relationships between parents and professionals was affected by power  
8  
9 313 imbalances. Parents often did not receive sufficient information and their participation in the  
10  
11 314 decision making and service providing was not considered in the practice. Although few  
12  
13 315 parental care involvement research is done in developing countries such as Iran, this finding is  
14  
15 316 supported by other Iranian study<sup>24,30,31</sup>. Khajeh et al. found that families in Iranian medical  
16  
17 317 fields are considered non-participating visitors<sup>32</sup>. Other studies in Finland, Sweden, the United  
18  
19 318 States and China showed that the level of parental involvement in the management of neonatal  
20  
21 319 pain varies, from parental absence to their full collaboration<sup>33,34</sup>. However, The participation  
22  
23 320 of the patients' family members and health care professionals is essential to provide optimal  
24  
25 321 care<sup>35</sup>. There are positive effects of parental involvement in the literature of developed  
26  
27 322 countries, such as reducing parental stress<sup>36</sup>, facilitating parent/ infant attachment<sup>37</sup>, and more  
28  
29 323 effectively manage neonatal pain<sup>38</sup>. Axelin et al. pointed out that when the health professionals  
30  
31 324 relationship with the parents is paternalistic, parents were usually absent or passive in  
32  
33 325 managing their neonate pain. They believed that implication of Family-Centered Care (FCC)  
34  
35 326 approach had a positive effect on information sharing and parental involvement in neonatal  
36  
37 327 pain management<sup>33</sup>. Mirlashari et al. also acknowledged that the low parental involvement in  
38  
39 328 Iranian NICUs is due to the marginalized FCC<sup>24</sup>. In the FCC model, the family is an essential  
40  
41 329 member of the health care team and has a close relationship with staff. In this model the parents  
42  
43 330 are the most influential contributors to caring for their neonates in the NICU<sup>39</sup>. Some studies  
44  
45 331 showed that the implementation of FCC model could increase the parents' participation in  
46  
47 332 neonates' pain management<sup>26,40</sup>. Evidence highlights the role of the organization in creating  
48  
49 333 instructions to change the context and provide the optimal parental involvement in neonatal  
50  
51 334 care<sup>25</sup>.

1  
2  
3 335 The lack of clear policy and supervising the health professionals' performance in relieving the  
4  
5 336 neonates' pain are the main challenges related to organizational structure. This increases the  
6  
7 337 evidence-practice gap and causes the staff to use analgesics based on their individual opinions  
8  
9  
10 338 and knowledge, which can lead to improper neonates' pain management. This finding is  
11  
12 339 supported by some studies in Iran <sup>41</sup> and other developing countries <sup>42</sup>. Studies often conducted  
13  
14 340 in developed countries emphasize the facilitation of optimal pain management with clear  
15  
16 341 organizational protocols and quality improvement policies <sup>16,28</sup>. A longitudinal study in Sweden  
17  
18 342 showed that the development of the program about the neonatal pain management and stay on  
19  
20 343 it increased the rate of the using of pain assessment tools 80% since 1993 to 2008 <sup>43</sup>. Nowadays,  
21  
22 344 reputable institutions and neonatal pain specialists recommend that the NICUs should have  
23  
24 345 evidence-based step-by-step protocol and continuous auditing program to optimal neonates'  
25  
26 346 pain management <sup>44</sup>. The American Academy of Pediatrics (AAP) listed the components of the  
27  
28 347 neonates' pain management protocol that include strategies to minimize the number of  
29  
30 348 performed painful procedures, routine pain assessment programs, and pharmacological and  
31  
32 349 non-pharmacological treatments for pain management during surgery and procedures <sup>45</sup>.  
33  
34 350 Stevens et al. used the evidence-based Practice for Improving Quality method and implemented  
35  
36 351 a multifaceted intervention to improve pain management in Canadian pediatric hospitals that  
37  
38 352 can be used in other settings. After examining the unit's base-line pain practices and reviewing  
39  
40 353 evidence of pain assessment and management in a participatory process, they identified their  
41  
42 354 protocol and improved the level of pain management with step-by-step interventions including  
43  
44 355 educational sessions, reminders, audit and feedback <sup>46</sup>.  
45  
46  
47 356 Organizational resources include the supplies and time necessary to meet work demands.  
48  
49 357 Achieving this organizational feature requires sufficient staff with the appropriate expertise to  
50  
51 358 be able to balance the job demands, workload, and time. In our study, some nurses raised time  
52  
53 359 management concerns more frequently than addressing their concerns about the neonates' pain  
54  
55  
56  
57  
58  
59  
60

1  
2  
3 360 management. High workload and lack of time cause accumulation of staff's duties. This issue,  
4  
5 361 along with the non-supportive organizational structure and lack of care providers' knowledge  
6  
7 362 about the importance of neonates' pain management can cause priority of some care that was  
8  
9 363 necessary for the newborn's survival and restrict the pain management. Rochefort et al. suggests  
10  
11 364 that staffing constraints and non-supportive work environments result in the rationing of  
12  
13 365 nursing interventions in NICU <sup>47</sup>. Moreover, a high workload can cause physical and mental  
14  
15 366 fatigue in staff and negatively affect their performance. Work overload and lack of time are the  
16  
17 367 international challenge in health institutions that affect in quality of care. Similar to our finding,  
18  
19 368 the studies that conducted in in Iran <sup>48</sup> and other countries <sup>28,34</sup> mentioned high workload as a  
20  
21 369 barrier to optimal management of patient pain. Although part of the high workload is due to  
22  
23 370 the nurse shortage, which requires interventions at the international and national levels,  
24  
25 371 nevertheless, some solutions such as reducing indirect care time by supplies availability,  
26  
27 372 providing enough off-duty hours, and more payments for extra work hours can motivate nurses  
28  
29 373 and improved the quality of neonatal pain management in busy settings.  
30  
31 374 Inadequate training programs on the neonates' pain management was another problem related  
32  
33 375 to organizational resources. According to the participants, the knowledge about various areas  
34  
35 376 of pain management was at a low level due to inadequate training. Although Cong et al.  
36  
37 377 concluded that care providers' knowledge of neonatal pain has changed dramatically in recent  
38  
39 378 decades<sup>34</sup>, there is still a need to improve it. Studies in developed and developing countries  
40  
41 379 have reported insufficient knowledge of health professionals in patient pain management  
42  
43 380 <sup>27,28,41,49</sup>. In this regard, international organizations and specialists stated that improvement the  
44  
45 381 knowledge of the health professionals by providing educational resources is an important factor  
46  
47 382 for appropriate pain management in the NICU <sup>45</sup>. Nowadays, pain management is one of the  
48  
49 383 topics of continuing education programs in developed settings. A study cited the use of  
50  
51 384 numerous training forums and seminars as a factor in promoting pain management in US  
52  
53  
54  
55  
56  
57  
58  
59  
60

1  
2  
3 385 hospitals<sup>28</sup>. In addition, other educational methods have been mentioned in studies that can be  
4  
5 386 used based on the facilities and conditions of each setting. For an example Rajasoorya  
6  
7 387 acknowledge that clinical rounds are a great opportunity to gain knowledge, and if performed  
8  
9 388 well, they can create unique learning opportunities and improve the quality of patient care<sup>50</sup>.  
10  
11  
12 389 However, knowledge-practice gap is a global issue. Sometimes there is knowledge about  
13  
14 390 protocols, standard procedures or guidelines, but they are ignored in practice<sup>51</sup>. It is necessary  
15  
16 391 to facilitate the use of knowledge along with its promotion. Some of facilities can include  
17  
18 392 respect for teamwork and coordination in providing care which was discussed previously. Also,  
19  
20 393 reducing work overload can provide the time needed to use of knowledge in relieving the  
21  
22 394 neonate's pain. It seems, there are some interactions between the study findings that emphasize  
23  
24 395 the complexity of making change and can be a basis for further studies.  
25  
26  
27  
28  
29 396

### 30 397 **Limitation**

31  
32  
33 398 Our study was conducted in the NICU of a government teaching hospital, which may have a  
34  
35 399 different environment from other clinical settings and limit the representativeness of the  
36  
37 400 findings. Although qualitative research is usually not generalizable and its emphasis is on in-  
38  
39 401 dept exploration of an issue. Another limitation is related to the hierarchical nature of the  
40  
41 402 medical environment, which although widespread internationally, is exacerbated in developing  
42  
43 403 countries. Medical hierarchical power structures have been linked to negative impacts by  
44  
45 404 creating environments that discourage the voicing of opinions and sharing information freely.  
46  
47 405 To deal with this issue, we emphasized on maintaining the confidentiality of the participants in  
48  
49 406 different stages of the study. Also, in order to control the effect of the nurse/physician power  
50  
51 407 imbalance, which increased the possibility of marginalization of nurses, the focus groups of the  
52  
53 408 nurses and physicians were held separately.  
54  
55  
56  
57  
58  
59 409

## 410 **Conclusion**

411 This study showed the organizational factors affecting the gap between the level of expected  
412 neonatal pain management in the NICU and the care provided. The non-encouraging  
413 organizational culture and its hierarchical nature caused the loss of communication channels  
414 between health team members and their insufficient interaction. Poor interprofessional  
415 collaboration led to inconsistency in care, missed opportunities to relieve the neonate's pain,  
416 and repeated painful procedures. The weakness of the FCC principles and the power imbalance  
417 between care providers and parents caused the low participation of parents in the management  
418 of their neonate's pain. An unresponsive organizational structure and lack of a clear policy on  
419 the quality of neonatal pain management were associated with care provider discretion and, in  
420 some cases, suboptimal pain management. Work overload caused care providers to give  
421 priority to the tasks that seemed more necessary in the setting. In addition, insufficient  
422 educational resources caused lack of knowledge and further marginalization of infant pain  
423 management.

## 425 **How might this information affect in practice?**

426 It seems that new strategies are needed for improving NICU pain management. Promoting  
427 interprofessional collaboration as well as parent-care providers' interactions can increase  
428 neonatal pain management. Moreover, to achieve optimal pain management, developing and  
429 implementing an evidence-based pain management protocol is necessary. An integrated  
430 clinical performance can be achieved through administrative supervision and frequent auditing.  
431 Due to the inadequate knowledge in the health care team, practical training is essential in such  
432 areas as control of environmental stimuli, pharmacological and non-pharmacological pain-  
433 relieving methods, and using pain assessment tools. Also, heavy workload can decrease the  
434 quality of staff performance about the management of neonatal pain. Reducing the workload

1  
2  
3 435 in health care organizations is complex and multifaceted, but fulfilling the physical and  
4  
5 436 emotional needs of the care team can improve their performance.  
6  
7

8 437

9  
10 438 **Acknowledgements**

11  
12 439 We would like to acknowledge all the participants who so willingly gave their time to be  
13  
14 440 interviewed.  
15

16  
17 441 **Contributorship statement**

18  
19 442 H.N: Conceptualization, Methodology, software, Data Curation, Project administration,  
20  
21 443 Formal analysis, Writing- original draft, Writing-review and editing. H.H: Conceptualization,  
22  
23 444 Methodology, Supervision, Formal analysis, Writing-review and editing. M.J:  
24  
25 445 Conceptualization, Methodology, Validation, Formal analysis, Writing-review and editing.  
26  
27 446 R.N: Methodology, Formal analysis, Validation.  
28  
29

30  
31 447 **Competing interests**

32  
33 448 None declared.  
34

35 449 **Funding**

36  
37 450 This study was funded by Tabriz University of Medical Sciences  
38  
39

40 451 **Data sharing statement**

41  
42 452 Data are available upon reasonable request.  
43  
44

45 453 **Ethics approval statement**

46  
47 454 The Ethics Committee of Tabriz University of Medical Sciences approved the study (code:  
48  
49 455 IR.TBZMED.REC.1398.985). Participants gave informed consent to participate in the study  
50  
51 456 before taking part.  
52  
53

54 457

55  
56 458 **References**  
57  
58  
59  
60



- 1  
2  
3 459 .1 Williams MD, Lascelles BD. Early neonatal pain—a review of clinical and experimental  
4 460 implications on painful conditions later in life. *Frontiers in pediatrics*. 2020;8:30.  
5 461 .2 Walker SM. Neonatal pain. *Pediatric Anesthesia*. 2014;24(1):39-48.  
6 462 .3 Moultrie F, Shriver A, Hartley C, et al. A universal right to pain relief: balancing the risks in a  
7 463 vulnerable patient population. *The Lancet Child & Adolescent Health*. 2019;3(2):62-64.  
8 464 .4 Banazadeh M, Rafii F. A concept analysis of neonatal palliative care in nursing: Introducing a  
9 465 dimensional analysis. *Comprehensive Child and Adolescent Nursing*. 2021;44(3):209-234.  
10 466 .5 Carter BS, Brunkhorst J. Neonatal pain management. *Seminars in perinatology*.  
11 467 2017;41(2):111-116.  
12 468 .6 Wallace H, Jones T. Managing procedural pain on the neonatal unit: Do inconsistencies still  
13 469 exist in practice? *Journal of Neonatal Nursing*. 2017;23(3):119-126.  
14 470 .7 Eriksson M, Campbell-Yeo M. Assessment of pain in newborn infants. *Seminars in Fetal and*  
15 471 *Neonatal Medicine*. 2019;24(4):101003.  
16 472 .8 Anand KJ, Eriksson M, Boyle EM, et al. Assessment of continuous pain in newborns admitted  
17 473 to NICU s in 18 E uropean countries. *Acta paediatrica*. 2017;106(8):1248-1259.  
18 474 .9 Tarjoman A, Vasigh A, Safari S, Borji M. Pain management in neonatal intensive care units :A  
19 475 cross sectional study of neonatal nurses in Ilam City. *Journal of Neonatal Nursing*.  
20 476 2019;25(3):136-138.  
21 477 .10 Lalloo C, Mohabir V, Campbell F, et al. Pediatric Project ECHO® for Pain: implementation and  
22 478 mixed methods evaluation of a virtual medical education program to support  
23 479 interprofessional pain management in children and youth. *BMC Medical Education*.  
24 480 2023;23(1):1-13.  
25 481 .11 Beck SL, Brant JM, Donohue R, et al. Oncology nursing certification: relation to nurses'  
26 482 knowledge and attitudes about pain, patient-reported pain care quality, and pain outcomes.  
27 483 Paper presented at: Oncology nursing forum2016.  
28 484 .12 Brant JM, Mohr C, Coombs NC, Finn S, Wilmarth E. Nurses' knowledge and attitudes about  
29 485 pain: personal and professional characteristics and patient reported pain satisfaction. *Pain*  
30 486 *Management Nursing*. 2017;18(4):214-223.  
31 487 .13 Alley LG. The influence of an organizational pain management policy on nurses' pain  
32 488 management practices. Paper presented at: Oncology Nursing Forum2001.  
33 489 .14 Latimer MA, Ritchie JA, Johnston CC. Individual nurse and organizational context  
34 490 considerations for better knowledge use in pain care. *Journal of pediatric nursing*.  
35 491 2010;25(4):274-281.  
36 492 .15 Losacco V, Cuttini M, Greisen G, et al. Heel blood sampling in European neonatal intensive  
37 493 care units: compliance with pain management guidelines. *Archives of Disease in Childhood-*  
38 494 *Fetal and Neonatal Edition*. 2011;96(1):F65-F68.  
39 495 .16 Stevens B, Riahi S, Cardoso R, et al. The influence of context on pain practices in the NICU:  
40 496 perceptions of health care professionals. *Qualitative Health Research*. 2011;21(6):757-770.  
41 497 .17 Razeq NMA, Akuma AO, Jordan S. Status of neonatal pain assessment and management in  
42 498 Jordan. *Pain Management Nursing*. 2016;17(4):239-248.  
43 499 .18 Cronin P, Coughlan M, Smith V. *Understanding nursing and healthcare research*. Sage; 2014.  
44 500 .19 Lambert SD, Loiselle CG. Combining individual interviews and focus groups to enhance data  
45 501 richness. *Journal of advanced nursing*. 2008;62(2):228-237.  
46 502 .20 Graneheim UH, Lundman B. Qualitative content analysis in nursing research: concepts,  
47 503 procedures and measures to achieve trustworthiness. *Nurse education today*. 2004;24(2):105-  
48 504 112.  
49 505 .21 Lincoln YS, Guba EG. *Naturalistic inquiry*. Newbury Park, CA: Sage; 1985.  
50 506 .22 Arnold EC, Boggs KU. *Interpersonal relationships e-book: professional communication skills for*  
51 507 *nurses*. Elsevier Health Sciences; 2019.

1  
2  
3  
4  
5  
6  
7  
8  
9  
10  
11  
12  
13  
14  
15  
16  
17  
18  
19  
20  
21  
22  
23  
24  
25  
26  
27  
28  
29  
30  
31  
32  
33  
34  
35  
36  
37  
38  
39  
40  
41  
42  
43  
44  
45  
46  
47  
48  
49  
50  
51  
52  
53  
54  
55  
56  
57  
58  
59  
60

- 508 .23 Schneider D. Informal Interactions, Gender, and Hierarchy: Barriers to Nurse-Physician  
509 Collaboration in a West Coast Hospital. 2015.
- 510 .24 Mirlashari J, Brown H ,Fomani FK, de Salaberry J, Zadeh TK, Khoshkhou F. The challenges of  
511 implementing family-centered care in NICU from the perspectives of physicians and nurses.  
512 *Journal of pediatric nursing*. 2020;50:e91-e98.
- 513 .25 Balice-Bourgeois C, Zumstein-Shaha M, Vanoni F ,Jaques C, Newman CJ, Simonetti GD. A  
514 systematic review of clinical practice guidelines for acute procedural pain on neonates. *The*  
515 *Clinical journal of pain*. 2020;36(5):390-398.
- 516 .26 Balice-Bourgeois C, Zumstein-Shaha M, Simonetti GD, Newman CJ. Interprofessional  
517 collaboration and involvement of parents in the management of painful procedures in  
518 newborns. *Frontiers in Pediatrics*. 2020;8.
- 519 .27 Razeq NMA. Barriers that impede the provision of pain care to neonates by nurses in Jordan.  
520 *Journal of Obstetric, Gynecologic & Neonatal Nursing*. 2016;45(3):371-377.
- 521 .28 Tavernier SS, Guo J-W, Eaton J, Brant JM, Berry P, Beck SL. Context matters for nurses leading  
522 pain improvement in US hospitals. *Pain Management Nursing*. 2018;19(5):474-486.
- 523 .29 Vestergaard E, Nørgaard B. Interprofessional collaboration: An exploration of possible  
524 prerequisites for successful implementation. *Journal of Interprofessional Care*.  
525 2018;32(2):185-195.
- 526 .30 Hassankhani H, Negarandeh R, Abbaszadeh M, Jabraeili M. The role of mothers during painful  
527 procedures on neonates: A focused ethnography. *Journal of Neonatal Nursing*. 2020.
- 528 .31 Neshat H, Hassankhani H, Negarandeh R, Jabraeili M, Hosseini MB, Mahallei M. Care  
529 providers' experiences regarding barriers to maternal participation in neonatal pain  
530 management. *Nursing in Critical Care*. 2023;28(2):245-252.
- 531 .32 Khajeh M, Nayeri ND, Bahramnezhad F, Hoseini ASS. Family centered care of hospitalized  
532 children: a hybrid concept analysis in Iran. *Health promotion perspectives*. 2017;7(4):210.
- 533 .33 Axelin A ,Anderzén-Carlsson A, Eriksson M, Pölkki T, Korhonen A, Franck LS. Neonatal intensive  
534 care nurses' perceptions of parental participation in infant pain management. *The Journal of*  
535 *perinatal & neonatal nursing*. 2015;29(4):363-374.
- 536 .34 Cong X, McGrath JM, Delaney C, et al. Neonatal nurses' perceptions of pain management:  
537 survey of the United States and China. *Pain Management Nursing*. 2014;15(4):834-844.
- 538 .35 Morley L, Cashell A. Collaboration in Health Care. *Journal of Medical Imaging and Radiation*  
539 *Sciences*. 2017;48(2):207-216.
- 540 .36 Axelin A, Lehtonen L, Pelander T, Salanterä S. Mothers' different styles of involvement in  
541 preterm infant pain care. *Journal of Obstetric, Gynecologic & Neonatal Nursing*.  
542 2010;39(4):415-424.
- 543 .37 Alinejad-Naeini M, Peyrovi H, Shoghi M. Childbearing culture: a prominent context in the  
544 process of maternal role attainment in Iranian mothers with preterm neonates. *Journal of*  
545 *Biosocial Science*. 2022;54(6):1035-1046.
- 546 .38 Ullsten A, Andreasson M, Eriksson M. State of the art in parent-delivered pain-relieving  
547 interventions in neonatal care: a scoping review. *Frontiers in Pediatrics*. 2021;9:651846.
- 548 .39 Franck LS, O'Brien K. The evolution of family-centered care: From supporting parent-delivered  
549 interventions to a model of family integrated care. *Birth defects research*. 2019;111(15):1044-  
550 1059.
- 551 .40 Ponthier L, Ensuque P, Guignon V, et al. Parental presence during painful or invasive  
552 procedures in neonatology: A survey of healthcare professionals. *Archives de Pédiatrie*.  
553 2020;27(7):362-367.
- 554 .41 Shirazi ZH, Soltanian M, Sarvestani RS. Relief and care in the shade: A concept extracted from  
555 practices of neonatal nurses during pain management. *Nursing Practice Today*. 2020;7(in  
556 press):X-X.

- 1  
2  
3 557 .42 Querido DL, Christoffel MM, Machado MED, de Almeida VS ,dos Santos Esteves APV, de  
4 558 Carvalho Matos PB. Perceptions of professionals on neonatal pain: a descriptive study. *Online*  
5 559 *Brazilian Journal of Nursing*. 2017;16(4):420-430.  
6 560 .43 Gradin M, Eriksson M, Group Ni. Neonatal pain assessment in Sweden—a fifteen-year follow  
7 561 up. *Acta paediatrica*. 2011;100(2):204-208.  
8 562 .44 Carachi P, Williams G. Acute pain management in the neonate. *Anaesthesia & Intensive Care*  
9 563 *Medicine*. 2020;21(2):99-104.  
10 564 .45 American Academy of Pediatrics. Prevention and Management of Procedural Pain in the  
11 565 Neonate: An Update. *Pediatrics*. 2016;137(2):e20154271.  
12 566 .46 Stevens BJ, Yamada J, Estabrooks CA, et al. Pain in hospitalized children: effect of a  
13 567 multidimensional knowledge translation strategy on pain process and clinical outcomes.  
14 568 *PAIN®*. 2014;15.68-60:(1)5  
15 569 .47 Rochefort CM, Rathwell BA, Clarke SP. Rationing of nursing care interventions and its  
16 570 association with nurse-reported outcomes in the neonatal intensive care unit: a cross-  
17 571 sectional survey. *BMC nursing*. 2016;15:1-8.  
18 572 .48 Neshat H, Hassankhani H, Jabraeili M, Negarandeh R, Hosseini M, Mahallei M. Views of nurses  
19 573 regarding pain control in neonatal intensive care units. *Family Medicine & Primary Care*  
20 574 *Review*. 2022;24(4):328-333.  
21 575 .49 Peng NH, Lee MC, Su WL, et al. Knowledge, attitudes and practices of neonatal professionals  
22 576 regarding pain management. *European Journal of Pediatrics*. 2020.  
23 577 .50 Rajasoorya C. Clinical ward rounds-challenges and opportunities. *Ann Acad Med Singapore*.  
24 578 2016;45(4):152-156.  
25 579 .51 Bhatti AM. KNOWLEDGE TRANSLATION IN HEALTHCARE-TIME TO BRIDGE KNOWLEDGE AND  
26 580 ACTION GAP. *Pakistan Armed Forces Medical Journal*. 2019;69(1):1-3.  
27  
28  
29  
30  
31 581  
32  
33  
34  
35  
36  
37  
38  
39  
40  
41  
42  
43  
44  
45  
46  
47  
48  
49  
50  
51  
52  
53  
54  
55  
56  
57  
58  
59  
60

## COREQ (COnsolidated criteria for REporting Qualitative research) Checklist

A checklist of items that should be included in reports of qualitative research. You must report the page number in your manuscript where you consider each of the items listed in this checklist. If you have not included this information, either revise your manuscript accordingly before submitting or note N/A.

| Topic                                          | Item No. | Guide Questions/Description                                                                                                                              | Reported on Page No. |
|------------------------------------------------|----------|----------------------------------------------------------------------------------------------------------------------------------------------------------|----------------------|
| <b>Domain 1: Research team and reflexivity</b> |          |                                                                                                                                                          |                      |
| <i>Personal characteristics</i>                |          |                                                                                                                                                          |                      |
| Interviewer/facilitator                        | 1        | Which author/s conducted the interview or focus group?                                                                                                   |                      |
| Credentials                                    | 2        | What were the researcher's credentials? E.g. PhD, MD                                                                                                     |                      |
| Occupation                                     | 3        | What was their occupation at the time of the study?                                                                                                      |                      |
| Gender                                         | 4        | Was the researcher male or female?                                                                                                                       |                      |
| Experience and training                        | 5        | What experience or training did the researcher have?                                                                                                     |                      |
| <i>Relationship with participants</i>          |          |                                                                                                                                                          |                      |
| Relationship established                       | 6        | Was a relationship established prior to study commencement?                                                                                              |                      |
| Participant knowledge of the interviewer       | 7        | What did the participants know about the researcher? e.g. personal goals, reasons for doing the research                                                 |                      |
| Interviewer characteristics                    | 8        | What characteristics were reported about the interviewer/facilitator? e.g. Bias, assumptions, reasons and interests in the research topic                |                      |
| <b>Domain 2: Study design</b>                  |          |                                                                                                                                                          |                      |
| <i>Theoretical framework</i>                   |          |                                                                                                                                                          |                      |
| Methodological orientation and Theory          | 9        | What methodological orientation was stated to underpin the study? e.g. grounded theory, discourse analysis, ethnography, phenomenology, content analysis |                      |
| <i>Participant selection</i>                   |          |                                                                                                                                                          |                      |
| Sampling                                       | 10       | How were participants selected? e.g. purposive, convenience, consecutive, snowball                                                                       |                      |
| Method of approach                             | 11       | How were participants approached? e.g. face-to-face, telephone, mail, email                                                                              |                      |
| Sample size                                    | 12       | How many participants were in the study?                                                                                                                 |                      |
| Non-participation                              | 13       | How many people refused to participate or dropped out? Reasons?                                                                                          |                      |
| <i>Setting</i>                                 |          |                                                                                                                                                          |                      |
| Setting of data collection                     | 14       | Where was the data collected? e.g. home, clinic, workplace                                                                                               |                      |
| Presence of non-participants                   | 15       | Was anyone else present besides the participants and researchers?                                                                                        |                      |
| Description of sample                          | 16       | What are the important characteristics of the sample? e.g. demographic data, date                                                                        |                      |
| <i>Data collection</i>                         |          |                                                                                                                                                          |                      |
| Interview guide                                | 17       | Were questions, prompts, guides provided by the authors? Was it pilot tested?                                                                            |                      |
| Repeat interviews                              | 18       | Were repeat interviews carried out? If yes, how many?                                                                                                    |                      |
| Audio/visual recording                         | 19       | Did the research use audio or visual recording to collect the data?                                                                                      |                      |
| Field notes                                    | 20       | Were field notes made during and/or after the interview or focus group?                                                                                  |                      |
| Duration                                       | 21       | What was the duration of the interviews or focus group?                                                                                                  |                      |
| Data saturation                                | 22       | Was data saturation discussed?                                                                                                                           |                      |
| Transcripts returned                           | 23       | Were transcripts returned to participants for comment and/or                                                                                             |                      |

| Topic                                  | Item No. | Guide Questions/Description                                                                                                        | Reported on Page No. |
|----------------------------------------|----------|------------------------------------------------------------------------------------------------------------------------------------|----------------------|
|                                        |          | correction?                                                                                                                        |                      |
| <b>Domain 3: analysis and findings</b> |          |                                                                                                                                    |                      |
| <i>Data analysis</i>                   |          |                                                                                                                                    |                      |
| Number of data coders                  | 24       | How many data coders coded the data?                                                                                               |                      |
| Description of the coding tree         | 25       | Did authors provide a description of the coding tree?                                                                              |                      |
| Derivation of themes                   | 26       | Were themes identified in advance or derived from the data?                                                                        |                      |
| Software                               | 27       | What software, if applicable, was used to manage the data?                                                                         |                      |
| Participant checking                   | 28       | Did participants provide feedback on the findings?                                                                                 |                      |
| <i>Reporting</i>                       |          |                                                                                                                                    |                      |
| Quotations presented                   | 29       | Were participant quotations presented to illustrate the themes/findings?<br>Was each quotation identified? e.g. participant number |                      |
| Data and findings consistent           | 30       | Was there consistency between the data presented and the findings?                                                                 |                      |
| Clarity of major themes                | 31       | Were major themes clearly presented in the findings?                                                                               |                      |
| Clarity of minor themes                | 32       | Is there a description of diverse cases or discussion of minor themes?                                                             |                      |

Developed from: Tong A, Sainsbury P, Craig J. Consolidated criteria for reporting qualitative research (COREQ): a 32-item checklist for interviews and focus groups. *International Journal for Quality in Health Care*. 2007. Volume 19, Number 6: pp. 349 – 357

**Once you have completed this checklist, please save a copy and upload it as part of your submission. DO NOT include this checklist as part of the main manuscript document. It must be uploaded as a separate file.**

# BMJ Open

## Organizational Challenges of Pain Management in Neonatal Intensive Care Unit: A Qualitative Study

|                                 |                                                                                                                                                                                                                                          |
|---------------------------------|------------------------------------------------------------------------------------------------------------------------------------------------------------------------------------------------------------------------------------------|
| Journal:                        | <i>BMJ Open</i>                                                                                                                                                                                                                          |
| Manuscript ID                   | bmjopen-2023-072695.R2                                                                                                                                                                                                                   |
| Article Type:                   | Original research                                                                                                                                                                                                                        |
| Date Submitted by the Author:   | 17-Jul-2023                                                                                                                                                                                                                              |
| Complete List of Authors:       | neshat, hanieh; Tabriz University of Medical Sciences<br>hassankhani, hadi; Tabriz University of Medical Sciences<br>jabraeili, mahnaz; Tabriz University of Medical Sciences<br>Negarandeh, Reza; Tehran University of Medical Sciences |
| <b>Primary Subject Heading</b>: | Nursing                                                                                                                                                                                                                                  |
| Secondary Subject Heading:      | Paediatrics                                                                                                                                                                                                                              |
| Keywords:                       | Neonatal intensive & critical care < INTENSIVE & CRITICAL CARE, PAIN MANAGEMENT, Organisation of health services < HEALTH SERVICES ADMINISTRATION & MANAGEMENT, QUALITATIVE RESEARCH                                                     |
|                                 |                                                                                                                                                                                                                                          |

SCHOLARONE™  
Manuscripts



I, the Submitting Author has the right to grant and does grant on behalf of all authors of the Work (as defined in the below author licence), an exclusive licence and/or a non-exclusive licence for contributions from authors who are: i) UK Crown employees; ii) where BMJ has agreed a CC-BY licence shall apply, and/or iii) in accordance with the terms applicable for US Federal Government officers or employees acting as part of their official duties; on a worldwide, perpetual, irrevocable, royalty-free basis to BMJ Publishing Group Ltd ("BMJ") its licensees and where the relevant Journal is co-owned by BMJ to the co-owners of the Journal, to publish the Work in this journal and any other BMJ products and to exploit all rights, as set out in our [licence](#).

The Submitting Author accepts and understands that any supply made under these terms is made by BMJ to the Submitting Author unless you are acting as an employee on behalf of your employer or a postgraduate student of an affiliated institution which is paying any applicable article publishing charge ("APC") for Open Access articles. Where the Submitting Author wishes to make the Work available on an Open Access basis (and intends to pay the relevant APC), the terms of reuse of such Open Access shall be governed by a Creative Commons licence – details of these licences and which [Creative Commons](#) licence will apply to this Work are set out in our licence referred to above.

Other than as permitted in any relevant BMJ Author's Self Archiving Policies, I confirm this Work has not been accepted for publication elsewhere, is not being considered for publication elsewhere and does not duplicate material already published. I confirm all authors consent to publication of this Work and authorise the granting of this licence.

1  
2  
3 **1 Title**

4  
5 2 Organizational Challenges of Pain Management in Neonatal Intensive Care Unit: A Qualitative  
6  
7  
8 3 Study

9  
10 **4 Author information**

11  
12 5 **Hanieh Neshat**; RN, MSc, BSc

13  
14 PhD in nursing, Pediatric Health Research Center, Tabriz University of Medical Sciences,  
15  
16  
17 Tabriz, Iran

18  
19 8 Faculty of Nursing and Midwifery, Tabriz University of Medical Sciences, Tabriz, Iran,

20  
21 9 ORCID: 0000-0003-1359-6467

22  
23  
24 10 **Hadi Hassankhani**; RN, PhD, MSc, BSc

25  
26 11 Professor in Nursing, Department of Medical and Surgical Nursing, Faculty of Nursing and  
27  
28  
29 12 Midwifery, Tabriz University of Medical Sciences, Tabriz, Iran

30  
31 13 ORCID: 0000-0001-7620-6425

32  
33 14 **Mahnaz Jabraeili**; RN, PhD, MSc, BSc

34  
35 15 Assistant Professor in Nursing, Department of Pediatrics, Faculty of Nursing and Midwifery,  
36  
37  
38 16 Tabriz University of Medical Sciences, Tabriz, Iran

39  
40 17 ORCID: 0000-0002-4035-1433

41  
42 18 **Reza Negarandeh**; RN, PhD, MSc, BSc

43  
44 19 Professor in Nursing, Nursing and Midwifery Care Research Center, School of Nursing and  
45  
46  
47 20 Midwifery, Tehran University of Medical Sciences, Tehran, Iran

48  
49 21 ORCID: 0000-0002-7597-5094

50  
51 22 **Corresponding author:** Hadi Hassankhani, School of Nursing and Midwifery, Tabriz  
52  
53  
54 23 University of Medical Sciences, Tabriz, Iran. E-mail; [hanie.neshat@yahoo.com](mailto:hanie.neshat@yahoo.com)

55  
56 24 Tel: +98-9183181267

57  
58  
59 25



1  
2  
3 26 **Organizational Challenges of Pain Management in Neonatal Intensive Care Unit: A**  
4  
5 27 **Qualitative Study**  
6  
7  
8 28

9  
10 29 **Abstract**  
11

12 30 **Objectives:** Despite credible evidence, optimal neonates' pain management in the neonatal  
13  
14 31 intensive care unit is a challenging issue. In this regard, the organizational context is an  
15  
16 32 essential factor. The existing challenges vary depending on the context, and investigating them  
17  
18 33 can help to improve the quality of care. The study aimed to explore organizational challenges  
19  
20 34 to neonates' pain management in the neonatal intensive care unit.  
21  
22

23  
24 35 **Methods:** This qualitative study included 31 nurses and physicians in the neonatal intensive  
25  
26 36 care unit of Children's Hospital, Tabriz, Iran. Data collection was done through individual and  
27  
28 37 focus group interviews. For data analysis, we used conventional content analysis.  
29

30  
31 38 **Results:** The identified challenges included organizational culture (poor interprofessional  
32  
33 39 collaboration and low parental participation), organizational structure (lack of unified approach  
34  
35 40 in relieving pain and limited supervision for pain management), and organizational resources  
36  
37 41 (lack of time due to high workload and inadequate educational programs).  
38  
39

40 42 **Conclusions:** Many organizational factors consistently affect neonatal pain management.  
41  
42 43 Adopting some approaches to enhance the cooperation of treatment team members, holding  
43  
44 44 educational programs, proper organizational supervision, and implementing a unified neonatal-  
45  
46 45 based pain management program could improve neonatal pain management.  
47  
48

49  
50  
51 47 **Strengths and limitations**  
52

53  
54 48 Strengths are:  
55  
56  
57  
58  
59  
60

- 1  
2  
3 49 • The exclusive focus on the organizational challenges of neonatal pain management in  
4  
5 50 the clinical setting of a developing country, which has been less addressed in other  
6  
7 51 studies.  
8  
9  
10 52 • The inclusion of a range of health professionals across different caring situations,  
11  
12 53 educational levels, and work experiences.  
13  
14  
15 54 • Triangulation in data collection (individual interviews and focus groups) which  
16  
17 55 increases the trustworthiness of the findings.  
18

19 56 Limitations are:

- 20  
21  
22 57 • Sampling of single NICU and lack of organizational diversity.  
23  
24 58 • Potential for missing some information due to the hierarchical nature of the setting that  
25  
26 59 discourages the voicing of opinions.  
27  
28  
29 60

## 31 61 **Background**

32  
33 62 Nowadays, the survival rate of neonates admitted to the neonatal intensive care unit (NICU)  
34  
35 63 has increased. Therefore, it is essential to optimize the NICU care and reduce the complications  
36  
37 64 of survived cases. In this regard, proper neonates' pain control is a priority. Despite the  
38  
39 65 misconceptions in the past, scientists have proved the neonates' perception of pain in recent  
40  
41 66 decades (1).  
42  
43  
44

45 67 Pain can increase the demand in the cardiovascular system and endanger the hemodynamic  
46  
47 68 status of the neonate by increasing the heart rate and decreasing the arterial oxygen saturation.  
48

49 69 It also increases the risk of intraventricular hemorrhage by increasing blood pressure in the  
50  
51 70 germinal matrix. The weak immune system and increased risk of infections are other problems  
52  
53 71 related to pain tolerance in neonates. Anxiety, abnormalities in processing pain (hypo- or hyper  
54  
55 72 sensitivity to pain), and developmental problems are some long-term effects of inappropriate  
56  
57 73 pain management in neonates (2). Studies show that the prevention of pain in the neonates is  
58  
59  
60

1  
2  
3 74 not only ethically essential, but it is also necessary for preventing short-term and long-term  
4  
5 75 complications and developmental disorders (3,4).  
6

7  
8 76 Although there have been theoretical advances and clinical guidelines related to pain  
9  
10 77 management in the NICU, it is still a severe challenge in complex care conditions (5) and needs  
11  
12 78 further research (6). Evidence suggests that the rate of routine pain assessment in NICU can be  
13  
14 79 as low as 6-10% (7,8) and only 7.1% of care providers always take interventions to reduce  
15  
16 80 neonates' pain (9).

17  
18  
19 81 Pain management of neonates is one of the most important tasks of care providers. Nurses in  
20  
21 82 particular play a significant role in pain management due to spending more time at the patient's  
22  
23 83 bedside (10). According to previous studies, the lack of knowledge in care providers is the  
24  
25 84 significant barrier to optimal pain management (11,12). The evidence shows that care  
26  
27 85 providers' knowledge of pain management and their perceived responsibility is significantly  
28  
29 86 related to the organization's policies (13). Nowadays, health care accreditation centers consider  
30  
31 87 the optimal management of pain as one of the indicators for evaluating the quality of care. They  
32  
33 88 extend patient pain management from an individual issue to an organizational issue and  
34  
35 89 emphasize the importance of the organization in providing safe care. Hence, the researchers  
36  
37 90 are trying to understand the role of organization in this area (14).  
38  
39

40  
41  
42 91 Evidence suggests that differences in service quality may be due to organizational differences  
43  
44 92 (15). In this regard, a study examined the role of organizational factors (culture, structure,  
45  
46 93 resources, capabilities, skills, and policies) in the NICU pain management of a developed  
47  
48 94 country and discussed the existing challenges (16). However, there is a belief that the NICU  
49  
50 95 context in developed countries may differ in developing countries, leading to different pain  
51  
52 96 management challenges (17).  
53

54  
55  
56 97 Although some studies have evaluated pain management in the NICU, limited studies have  
57  
58 98 focused on organizational challenges in developing countries. Accordingly, the present  
59  
60

1  
2  
3 99 descriptive qualitative study was conducted with the aim of investigating the organizational  
4  
5 100 challenges of NICU pain management in Tabriz, Iran.  
6  
7  
8 101

## 10 102 **Methods**

11  
12 103 The interpretive descriptive method was used to evaluate the perceptions of health  
13  
14 104 professionals on organizational pain management challenges in the NICU. Descriptive  
15  
16 105 qualitative research helps to describe or discover a phenomenon or a problem, and the  
17  
18 106 researcher can use it to examine a wide range of topics related to people's experiences,  
19  
20 107 perceptions, and perspectives (18). The Ethics Committee of Tabriz University of Medical  
21  
22 108 Sciences approved the study (code: IR.TBZMED.REC.1398.985).  
23  
24  
25

26 109 The study was conducted in a NICU (level III) in Tabriz, East Azerbaijan province in the  
27  
28 110 northwest of Iran. The NICU was a referral center for term and preterm neonates with various  
29  
30 111 medical and surgical diseases. The physical space of the NICU included three large halls  
31  
32 112 equipped with 27 warmers. The average ratio of nurse to patient was 1:3. In this ward, different  
33  
34 113 types of painful interventions are performed according to the neonates' needs. The ward has an  
35  
36 114 accommodation for mothers, which includes a kitchen, toilet, bathroom and a large hall with  
37  
38 115 multiple beds and wardrobes. Mothers can stay in the ward and with their infant 24 hours a  
39  
40 116 day.  
41  
42  
43  
44  
45  
46

## 47 118 **Participants and recruitment**

48  
49 119 Interviews were conducted with 26 nurses and 5 physicians who had at least 6 months of  
50  
51 120 experience in the NICU. In order to make an informed decision of staff about whether to  
52  
53 121 participate, the first author went to the NICU and explained the purpose of the research to them  
54  
55 122 (potential participants). All were given the opportunity to ask questions. The first author also  
56  
57 123 informed them about the voluntary nature of the participation, their right to privacy and  
58  
59  
60

124 confidentiality. All participants were assured that they could withdraw from the study at any  
 125 time without giving any reason. Then, staff were offered an interview by the first author and  
 126 no one declined to take part. Volunteered participants received, and studied written information.  
 127 They completed the consent form and expressed their willingness to participate in the  
 128 individual or focus interviews. The purposive sampling was used to achieve the maximum  
 129 variation. For this purpose, we selected the participants with various age ranges, educational  
 130 levels, work experiences, organizational positions, and professions for either individual or  
 131 focus interviews (Table1).

132 Table 1. Demographic Characteristics of Participants

| Participants<br>(N=31) | Age<br>(Year) | Marital status<br>Married/Single | Educational<br>status                             | Organizational<br>position                                                          | Work<br>experience<br>(Year) |
|------------------------|---------------|----------------------------------|---------------------------------------------------|-------------------------------------------------------------------------------------|------------------------------|
| Nurse<br>(N=26)        | 30-44         | 23 / 3                           | MSc =1<br>BSc =25                                 | Clinical<br>Supervisor=1<br>Educational<br>Supervisor=1<br>Head Nurse=2<br>Nurse=22 | 5-20                         |
| Physician<br>(N=5)     | 35-48         | 5 / 0                            | Neonatologist=4<br>Fellowship of<br>neonatology=1 | Academic<br>Member=2<br>Clinical<br>Physician=2<br>Assistant=1                      | 4-18                         |

133

134

1  
2  
3 135 **Patient and public involvement**  
4

5 136 No patient involved.  
6  
7

8 137  
9

10 138 **Data Collection**  
11

12 139 Data were collected from February 2021 to January 2022 through 11 individual interviews and  
13  
14 140 three focus group discussions with 7-, 8-, and 5-participants, respectively. The place and time  
15  
16 141 of the interview were chosen according to the participants' preference and their privacy was  
17  
18 142 respected during the interview. The interviews were voice-recorded after obtaining the  
19  
20 143 participants' consent. The individual interviews lasted an average of 42 minutes (range: 23–  
21  
22 144 65min). All of them were performed in the coffee room, according to the preference of the  
23  
24 145 participants. The first author, who had a clinical and research background in neonatal care, led  
25  
26 146 the individual interviews. She used a semi-structured interview guide that focused on  
27  
28 147 participants' experiences of neonatal pain management in NICU (Table 2).  
29  
30  
31  
32

33 148  
34

35 149 Table 2. Interview Guide  
36  
37

38 Main questions:

39  
40 It's very valuable for me to know about your experiences of managing infant pain in your  
41  
42 NICU. Please talk about them if you wish.  
43

44 What are health care services provided to manage the infant pain in your NICU?  
45

46 What are the problems in managing infant pain in your NICU?  
47

48 What organizational factors are effective in managing the neonatal pain?  
49

50 Probing questions:  
51

52 Could you explain more?  
53

54 What do you mean?  
55  
56  
57  
58  
59  
60

Can you give an example to clarify further?

150

151 In order to achieve a broader and richer range of information when no new information  
152 emerged from the individual interviews, three focus groups were conducted by the first author  
153 in a conference hall of the center. Integrating individual and focus interviews makes a  
154 productive process and enriches data to conceptualize the phenomenon (19). The focus group  
155 sessions began by providing information about the study, and the questions asked were similar  
156 to the individual interviews. The first author transferred the topics from one to another and, if  
157 necessary, extracted the meaning of the participants' answers and elicited more details.

158

### 159 **Data Analysis**

160 We began coding before data collection had finished. This allowed us to reflect on how  
161 questions were asked during interviews and learn more about topics of relevance to the research  
162 aims. The audio-recorded interviews were transcribed verbatim and were double-checked for  
163 anonymity and accuracy. Conventional content analysis was used to interpret the transcripts.  
164 In this approach, inductive codes, sub-themes, and themes emerged from the transcripts. We  
165 used Graneheim and Lundman algorithms to analyze the data (20). MAXQDA10 software was  
166 used for data analysis. The data analysis steps was presented in Table 3.

167 Table 3. The Steps of Data Analysis

A- The first author transcribed each interview and read it several times to obtain a comprehensive view.

B- Sentences, and paragraphs considered meaning units were condensed according to their content.

C- The condensed meaning units were abstracted and labeled with codes (852 codes).

D- A group of 4 researchers (HN, HH, MJ, and RN) reviewed and discussed condensed meaning units and codes once more to resolve any conflicts in the concept of one code or any possible similarities in several codes.

E- They sorted the codes based on their similarities and differences with sub-themes.

F- Finally, themes were formulated from the classification of sub-themes.

168

169

### 170 **Trustworthiness**

171 We used Guba and Lincoln's criteria to assess trustworthiness (21). Credibility was enhanced  
172 through purposive sampling with the principle of maximum variation to select the participants.

173 In addition to individual interviews, we used focus groups to collect data. Also, to verify the  
174 data and the extracted codes, the member check was used. The researchers were familiar with  
175 the NICU department, and they were experienced in qualitative research. For the study's  
176 dependability, we tried to clearly describe the research steps taken from the beginning of the  
177 research project to the development and reporting of findings. We also used probing questions  
178 to increase dependability. In addition, the process of data collection and findings were audited  
179 by experts, which helped promote confirmability.

180

### 181 **Results**

182 Three main themes and six sub-themes that explained the organizational challenges to optimal  
183 neonates' pain management in the NICU were identified (Table 4).

184 Table 4. Themes and Sub-themes

| Themes                 | Sub-themes                           |
|------------------------|--------------------------------------|
| Organizational culture | Poor interprofessional collaboration |



|                          |                                         |
|--------------------------|-----------------------------------------|
|                          | Low parental participation              |
| Organizational structure | Lack of unified approach to pain relief |
|                          | Limited supervision for pain management |
| Organizational resources | Lack of time due to high workload       |
|                          | Inadequate educational programs         |

185

## 186 **Organizational Culture**

### 187 *Poor interprofessional collaboration*

188 According to the participants, individual decision-making on doing tasks and poor coordination  
 189 among team members led to such problems as repetitive manipulations of the neonates,  
 190 disorganization, and limited opportunities to relieve the neonates' pain. Also, the staff did not  
 191 talk to each other about the pain management of the neonates and no suggestions were  
 192 exchanged between them. Although the nurses talked to physicians about the need to control  
 193 neonates' pain and made suggestions in some cases, they were usually dismissed by the  
 194 physicians because they had more decision-making power.

195

196 *"Staff just want to do their job. For example, the doctor comes and says: 'I want to do an LP*  
 197 *on the infant.' Without coordinating the things related to managing the neonate's pain with the*  
 198 *nurse!"* (Participant 3)

199

### 200 *Low parental participation*

201 Although the parents were present in the ward, they were not considered members of the care  
 202 team, and were not often consulted. The participants believed that the staff usually controlled  
 203 the parents, and the parents acted according to the staff's wishes. Usually, parents are given

1  
2  
3 204 limited information about their neonate's pain and how to participate and relieve it. This led to  
4  
5 205 a one-way and non-interactive relationship between family and the staff. As a result, they could  
6  
7  
8 206 not play a fully effective role in activities such as relieving their neonate's pain.  
9

10 207

11  
12 208 *"In our ward, usually we do not involve the parents in controlling the baby's pain. Most of the*  
13  
14 209 *time, the staff asks the parents to go out and come back after managing the neonate's pain.*

15  
16  
17 210 *This is quite acceptable behavior in the ward."* (Participant 21)  
18

19 211

## 20 212 **Organizational structure**

### 21 213 *Lack of unified approach in relieving pain*

22  
23  
24 214 According to the participants, there were no predefined and specific policy for pain control in  
25  
26 215 the ward. As a result, no positive atmosphere and clear expectations in terms of pain-relieving  
27  
28 216 actions were created. This caused a lack of strong support for the implementing of evidence in  
29  
30 217 practice. Although several health care professionals working in the NICU did things to relieve  
31  
32 218 the neonates' pain based on their personal preference, credible pain assessment tools and pain  
33  
34 219 prevention and management policies were not used abundantly. Thus, there were  
35  
36 220 disagreements and arbitrary pain management in the ward. The participants believed that  
37  
38 221 specific protocols could help to improve outcomes and develop optimal pain management  
39  
40 222 practices in the NICU, leading to the uniformity of performance among different professions  
41  
42 223 and clinicians.  
43  
44  
45  
46  
47  
48

49 224

50  
51 225 *"Currently, it is unclear what we should do to control the pain in different situations. For*  
52  
53 226 *example, we don't know what exactly to do to control the pain of a neonate after surgery. The*  
54  
55 227 *internal medicine and surgery team members have different opinions on this issue, and their*  
56  
57  
58  
59  
60

1  
2  
3 228 *lack of understanding sometimes causes the neonate not to be given painkillers at all.*"

4  
5 229 (Participant 1)

6  
7  
8 230

9  
10 231 *"We have neonatologists with different methods of practicing; some of them prescribe*

11  
12 232 *painkillers more commonly than others. Perhaps we could have some predefined instructions*

13  
14 233 *for a variety of methods or painful pain management because some care-providers might think*

15  
16 234 *that a specific method is not very painful.*" (Participant 13)

17  
18  
19 235

20  
21 236 *Limited supervision for pain management*

22  
23 237 There is little demand from the organization regarding the neonatal pain management. Also,

24  
25 238 the staff's performance regarding neonatal pain management is not supervised. The participants

26  
27 239 explained that the Hospital Quality Assurance Committee had no policies on assessing the

28  
29 240 quality of neonatal pain management. Also, the patients' pain management was not explicitly

30  
31 241 mentioned in the job description of the staff, and the neonates' pain management was not

32  
33 242 examined in the monthly and annual performance evaluations of the staff. Thus, the

34  
35 243 performance of health professionals regarding the use of analgesics was not often questioned.

36  
37 244 However, in some cases, verbal warnings were delivered to some health professionals highly

38  
39 245 inattentive to the patients' pain. Furthermore, there were no clear policies to encourage health

40  
41 246 professionals who performed well in managing the neonates' pain. Accordingly, appropriately

42  
43 247 managing of the neonates' pain was not considered a professional value.

44  
45  
46 248

47  
48 249 *"Nobody asks staff about the quality of their performance in relieving infant's pain. We feel*

49  
50 250 *we're not evaluated or monitored in this regard; and we are completely free to do it or not.*"

51  
52 251 (Participant 10)

53  
54  
55 252

## 253 **Organizational Resources**

### 254 *Lack of time due to high workload*

255 According to the participants, a high workload was another challenge to appropriate pain  
256 management in the NICU. In most cases, the health professionals did not perform well in  
257 relieving the neonates' pain due to lack of time and work overload. Care-providers mentioned  
258 the large number of patients as a challenge for pain management. They believed that the high  
259 workload resulted in limited attention to the neonates' pain and not using analgesics before the  
260 procedures. Also, some nurses believed that less pain during the procedure required two nurses,  
261 but the lack of time made it impossible for them to help their colleagues during the painful  
262 procedure.

263

264 *"A nurse with three patients may admit another one. This workload makes pain management*  
265 *difficult. She/he only thinks of doing their duties quickly and finishing the shift."* (Participant  
266 25)

267

### 268 *Inadequate educational program*

269 According to the participants, the lack of adequate training programs and consequently  
270 insufficient knowledge caused the staff not to know the benefits and importance of controlling  
271 the neonates' pain. Some of the educational needs mentioned by the participants included  
272 gaining knowledge and skills in using pain assessment tools and pain management techniques  
273 appropriate for different situations and procedures, as well as using analgesics. From the  
274 participants' point of view, attending in-service training courses for managing the neonates'  
275 pain and participation in research projects or quality improvement activities could increase the  
276 health professionals' awareness of the neonates' pain and its treatment benefits.

277

1  
2  
3 278 *“There is no training program for the NICU staff about the importance and methods of*  
4  
5 279 *relieving pain in neonates. Since the treatment team members know little about this issue, we*  
6  
7 280 *should not expect them to perform well.”* (Participant 24)  
8  
9  
10  
11 281

## 14 282 **Discussion**

16 283 According to our results, organizational factors, including cultural, structural, and resource  
17  
18 284 issues, can affect the optimal control of neonates' pain in the NICU.

21 285 Organizational culture is the model of group's prevalent assumptions, which develops through  
22  
23 286 a shared history, experiences, and learning (16). The health professionals who participated in  
24  
25 287 our study believed that the low participatory culture and poor collaboration of health team  
26  
27 288 members threatened the optimal management of the neonates' pain. This issue has caused such  
28  
29 289 problems as over-stimulation of the neonates, inconsistencies in caring, and losing  
30  
31 290 opportunities to relieve the pain. Interprofessional collaboration is a way in which different  
32  
33 291 health care professionals interact with each other to make clinical decisions after considering  
34  
35 292 each other's knowledge. In this way, the specialists undertake complementary roles and get  
36  
37 293 involved in problem-solving and decision-making processes to develop and implement patient  
38  
39 294 care programs (22). Participants in the study cited the hierarchical nature and clinical  
40  
41 295 dominance of physicians over nurses as a barrier to appropriate collaboration. Power  
42  
43 296 imbalances in clinical practice are a crucial barrier to joint decision-making, which can affect  
44  
45 297 the quality of care (23). The findings of our study are supported by the other literature.  
46  
47 298 Mirlashari et al. showed that the power imbalance between physicians and nurses in Iranian  
48  
49 299 NICUs leads to insufficient team collaboration in providing care (24). In studies conducted in  
50  
51 300 developed countries, proper communication and interprofessional collaboration in complex  
52  
53 301 care settings such as the NICU was considered the vital element of effective practice on pain  
54  
55  
56  
57  
58  
59  
60

1  
2  
3 302 (16,25,26). According to studies, finding communication channels between the health care  
4  
5 303 members can reduce power imbalance and improve their ability to negotiate pain management  
6  
7 304 approaches (27). In contrast to our study finding, Tavernier et al. identified team collaboration  
8  
9 305 as a contextual factor in optimal pain management in U.S. hospitals. They acknowledged that  
10  
11 306 interprofessional educational programs have improved communication between the disciplines  
12  
13 307 and supported collaborative relationships (28). This strategy can be used in countries such as  
14  
15 308 Iran, where insufficient communication and collaboration among health professionals is  
16  
17 309 considered a challenge in the quality of care. The users of educational programs in Iranian  
18  
19 310 health institutions are traditionally all from the same discipline. Also, evidence-based strategies,  
20  
21 311 such as interprofessional practice teams, can improve interprofessional collaboration (29).  
22  
23 312 The findings of this study indicate insufficient parent-health professional collaboration in  
24  
25 313 neonates' pain management. Organizational culture did not adequately support parental  
26  
27 314 involvement, and relationships between parents and professionals was affected by power  
28  
29 315 imbalance. Parents often did not receive sufficient information and their participation in the  
30  
31 316 decision making and service providing was not considered in practice. Although few parental  
32  
33 317 care involvement research is done in developing countries such as Iran, this finding is supported  
34  
35 318 by other Iranian study (24,30,31). Khajeh et al. found that families in Iranian medical fields are  
36  
37 319 considered non-participating visitors (32). Other studies in Finland, Sweden, the United States  
38  
39 320 and China showed that the level of parental involvement in the management of neonatal pain  
40  
41 321 varies, from parental absence to their full collaboration (33,34). However, The participation of  
42  
43 322 the patients' family members and health care professionals is essential to provide optimal care  
44  
45 323 (35). There are positive effects of parental involvement in the literature of developed countries,  
46  
47 324 such as reducing parental stress (36), facilitating parent/ infant attachment (37), and more  
48  
49 325 effectively managing neonatal pain (38). Axelin et al. pointed out that when the health  
50  
51 326 professionals' relationship with the parents is paternalistic, parents were usually absent or  
52  
53  
54  
55  
56  
57  
58  
59  
60

1  
2  
3 327 passive in managing their neonate pain. They believed that the implication of the Family-  
4  
5 328 Centered Care (FCC) approach had a positive effect on information sharing and parental  
6  
7 329 involvement in neonatal pain management (33). Mirlashari et al. also acknowledged that the  
8  
9 330 low parental involvement in Iranian NICUs is due to the marginalized FCC (24). In the FCC  
10  
11 331 model, the family is an essential member of the health care team and has a close relationship  
12  
13 332 with staff. In this model the parents are the most influential contributors to caring for their  
14  
15 333 neonates in the NICU (39). Some studies showed that the implementation of FCC model could  
16  
17 334 increase the parents' participation in neonates' pain management (26,40). Evidence highlights  
18  
19 335 the role of the organization in creating instructions to change the context and provide the  
20  
21 336 optimal parental involvement in neonatal care (25).

22  
23  
24 337 The lack of clear policy and supervising the health professionals' performance in relieving the  
25  
26 338 neonates' pain are the main challenges related to organizational structure. This increases the  
27  
28 339 evidence-practice gap and causes the staff to use analgesics based on their individual opinions  
29  
30 340 and knowledge, which can lead to improper neonates' pain management. This finding is  
31  
32 341 supported by some studies in Iran (41) and other developing countries (42). Studies often  
33  
34 342 conducted in developed countries emphasize the facilitation of optimal pain management with  
35  
36 343 clear organizational protocols and quality improvement policies (16,28). A longitudinal study  
37  
38 344 in Sweden showed that the development of the program about neonatal pain management and  
39  
40 345 staying on it increased the rate of the use of pain assessment tools by 80% from 1993 to 2008  
41  
42 346 (43). Nowadays, reputable institutions and neonatal pain specialists recommend that the NICUs  
43  
44 347 should have evidence-based step-by-step protocol and continuous auditing program for  
45  
46 348 optimal neonates' pain management (44). The American Academy of Pediatrics (AAP) listed  
47  
48 349 the components of the neonates' pain management protocol that include strategies to minimize  
49  
50 350 the number of performed painful procedures, routine pain assessment programs, and  
51  
52 351 pharmacological and non-pharmacological treatments for pain management during surgery and  
53  
54  
55  
56  
57  
58  
59  
60

1  
2  
3 352 procedures (45). Stevens et al. used the evidence-based Practice for Improving Quality method.  
4  
5 353 They implemented a multifaceted intervention to improve pain management in Canadian  
6  
7 354 pediatric hospitals that can be used in other settings. After examining the unit's baseline pain  
8  
9 355 practices and reviewing evidence of pain assessment and management in a participatory  
10  
11 356 process, they identified their protocol. They improved the level of pain management with step-  
12  
13 357 by-step interventions including, educational sessions, reminders, audit and feedback (46).  
14  
15 358 Organizational resources include the supplies and time necessary to meet work demands.  
16  
17 359 Achieving this organizational feature requires sufficient staff with the appropriate expertise to  
18  
19 360 balance the job demands, workload, and time. In our study, some nurses raised time  
20  
21 361 management concerns more frequently than addressing their concerns about the neonates' pain  
22  
23 362 management. High workload and lack of time cause accumulation of staff's duties. This issue,  
24  
25 363 along with the non-supportive organizational structure and lack of care providers' knowledge  
26  
27 364 about the importance of neonates' pain management can cause priority of some care necessary  
28  
29 365 for the newborn's survival and restrict the pain management. Rochefort et al. suggest that  
30  
31 366 staffing constraints and non-supportive work environments result in the rationing of nursing  
32  
33 367 interventions in NICU (47). Moreover, a high workload can cause physical and mental fatigue  
34  
35 368 in staff and negatively affect their performance. Work overload and lack of time are the  
36  
37 369 international challenge in health institutions that affect in quality of care. Similar to our finding,  
38  
39 370 the studies conducted in Iran (48) and other countries (28,34) mentioned high workload as a  
40  
41 371 barrier to optimal management of patient pain. Although part of the high workload is due to  
42  
43 372 the nurse shortage, which requires interventions at the international and national levels,  
44  
45 373 nevertheless, some solutions such as reducing indirect care time by supplies availability,  
46  
47 374 providing enough off-duty hours, and more payments for extra work hours can motivate nurses  
48  
49 375 and improve the quality of neonatal pain management in busy settings.  
50  
51  
52  
53  
54  
55  
56  
57  
58  
59  
60



1  
2  
3 376 Inadequate training programs on the neonates' pain management was another problem related  
4  
5 377 to organizational resources. According to the participants, the knowledge about various areas  
6  
7 378 of pain management was at a low level due to inadequate training. Although Cong et al.  
8  
9 379 concluded that care providers' knowledge of neonatal pain has changed dramatically in recent  
10  
11 380 decades (34), there is still a need to improve it. Studies in developed and developing countries  
12  
13 381 have reported insufficient knowledge of health professionals in patient pain management  
14  
15 382 (27,28,41,49). In this regard, international organizations and specialists stated that  
16  
17 383 improvement the knowledge of the health professionals by providing educational resources is  
18  
19 384 an important factor for appropriate pain management in the NICU (45). Nowadays, pain  
20  
21 385 management is one of the topics of continuing education programs in developed settings. A  
22  
23 386 study cited numerous training forums and seminars as a factor in promoting pain management  
24  
25 387 in US hospitals (28). In addition, other educational methods have been mentioned in studies  
26  
27 388 that can be used based on the facilities and conditions of each setting. For example Rajasoorya  
28  
29 389 acknowledges that clinical rounds are a great opportunity to gain knowledge. If performed well,  
30  
31 390 they can create unique learning opportunities and improve the quality of patient care (50).  
32  
33 391 However, knowledge-practice gap is a global issue. Sometimes there is knowledge about  
34  
35 392 protocols, standard procedures or guidelines, but they are ignored in practice (51). It is  
36  
37 393 necessary to facilitate the use of knowledge along with its promotion. Some facilities can  
38  
39 394 include respect for teamwork and coordination in providing care which was discussed  
40  
41 395 previously. Also, reducing work overload can provide the time needed to use knowledge to  
42  
43 396 relieve the neonate's pain. It seems, there are some interactions between the study findings that  
44  
45 397 emphasize the complexity of making change and can be a basis for further studies.  
46  
47  
48  
49  
50  
51  
52  
53  
54  
55

## 56 399 **Limitation**

1  
2  
3 400 Our study was conducted in the NICU of a government teaching hospital, which may have a  
4  
5 401 different environment from other clinical settings and limit the representativeness of the  
6  
7 402 findings. Although qualitative research is usually not generalizable and its emphasis is the in-  
8  
9 403 depth exploration of an issue. Another limitation is related to the hierarchical nature of the  
10  
11 404 medical environment, which although widespread internationally, is exacerbated in developing  
12  
13 405 countries. Medical hierarchical power structures have been linked to negative impacts by  
14  
15 406 creating environments that discourage the voicing of opinions and sharing information freely.  
16  
17 407 To deal with this issue, we emphasized maintaining the confidentiality of the participants at  
18  
19 408 different stages of the study. Also, in order to control the effect of the nurse/physician power  
20  
21 409 imbalance, which increased the possibility of marginalization of nurses, the focus groups of the  
22  
23 410 nurses and physicians were held separately.  
24  
25  
26  
27  
28  
29  
30

411

## 412 **Conclusion**

31  
32  
33 413 This study showed the organizational factors affecting the gap between the level of expected  
34  
35 414 neonatal pain management in the NICU and the care provided. The non-encouraging  
36  
37 415 organizational culture and its hierarchical nature caused the loss of communication channels  
38  
39 416 between health team members and their insufficient interaction. The poor interprofessional  
40  
41 417 collaboration led to inconsistent care, missed opportunities to relieve the neonate's pain, and  
42  
43 418 repeated painful procedures. The weakness of the FCC principles and the power imbalance  
44  
45 419 between care providers and parents caused the low participation of parents in the management  
46  
47 420 of their neonate's pain. An unresponsive organizational structure and lack of a clear policy on  
48  
49 421 the quality of neonatal pain management were associated with care provider discretion and, in  
50  
51 422 some cases, suboptimal pain management. Work overload caused care providers to prioritize  
52  
53 423 tasks that seemed more necessary in the setting. In addition, insufficient educational resources  
54  
55 424 caused a lack of knowledge and further marginalization of infant pain management.  
56  
57  
58  
59  
60

1  
2  
3 425  
4  
5  
6 426 **How might this information affect in practice?**  
7  
8 427 It seems that new strategies are needed to improve NICU pain management. Promoting  
9  
10 428 interprofessional collaboration and parent-care providers' interactions can increase neonatal  
11  
12 429 pain management. Moreover, developing and implementing an evidence-based pain  
13  
14 430 management protocol is necessary to achieve optimal pain management. An integrated clinical  
15  
16 431 performance can be achieved through administrative supervision and frequent auditing. Due to  
17  
18 432 the inadequate knowledge in the health care team, practical training is essential in such areas  
19  
20 433 as control of environmental stimuli, pharmacological and non-pharmacological pain-relieving  
21  
22 434 methods, and using pain assessment tools. Also, a heavy workload can decrease the quality of  
23  
24 435 staff performance in managing of neonatal pain. Reducing the workload in health care  
25  
26 436 organizations is complex and multifaceted, but fulfilling the physical and emotional needs of  
27  
28 437 the care team can improve their performance.  
29  
30  
31  
32  
33 438  
34  
35 439 **Acknowledgements**  
36  
37 440 We would like to acknowledge all the participants who willingly gave their time to be  
38  
39 441 interviewed.  
40  
41  
42 442 **Contributorship statement**  
43  
44 443 H.N: Conceptualization, Methodology, Software, Data Curation, Project administration,  
45  
46 444 Formal analysis, Writing- original draft, Writing-review and editing. H.H: Conceptualization,  
47  
48 445 Methodology, Supervision, Formal analysis, Writing-review and editing. M.J:  
49  
50 446 Conceptualization, Methodology, Validation, Formal analysis, Writing-review and editing.  
51  
52 447 R.N: Methodology, Formal analysis, Validation.  
53  
54  
55  
56 448 **Competing interests**  
57  
58 449 None declared.  
59  
60

1  
2  
3 450 **Funding**

4  
5 451 This study was funded by Tabriz University of Medical Sciences

6  
7 452 **Data sharing statement**

8  
9 453 Data are available upon reasonable request.

10  
11 454 **Ethics approval statement**

12  
13 455 The Ethics Committee of Tabriz University of Medical Sciences approved the study (code:  
14  
15 456 IR.TBZMED.REC.1398.985). Participants gave informed consent to participate in the study  
16  
17 457 before taking part.  
18  
19  
20  
21  
22 458

23  
24 459 **References**

- 25  
26 460 .1 Williams MD, Lascelles BDX. Early neonatal pain—a review of clinical and experimental  
27 461 implications on painful conditions later in life. *Frontiers in pediatrics*. 2020;8:30.  
28 462 .2 Walker SM. Neonatal pain. *Pediatric Anesthesia*. 2014;24(1):39-48.  
29 463 .3 Moultrie F, Shriver A, Hartley C, et al. A universal right to pain relief: balancing the risks in a  
30 464 vulnerable patient population. *The Lancet Child & Adolescent Health*. 2019;3(2):62-64.  
31 465 .4 Banazadeh M, Rafii F. A concept analysis of neonatal palliative care in nursing: Introducing a  
32 466 dimensional analysis. *Comprehensive Child and Adolescent Nursing*. 2021;44(3):209-234.  
33 467 .5 Carter BS, Brunkhorst J. Neonatal pain management. *Seminars in perinatology*.  
34 468 2017;41(2):111-116.  
35 469 .6 Wallace H, Jones T. Managing procedural pain on the neonatal unit: Do inconsistencies still  
36 470 exist in practice? *Journal of Neonatal Nursing*. 2017;23(3):119-126.  
37 471 .7 Eriksson M, Campbell-Yeo M. Assessment of pain in newborn infants. *Seminars in Fetal and*  
38 472 *Neonatal Medicine*. 2019;24(4):101003.  
39 473 .8 Anand KJ, Eriksson M, Boyle EM, et al. Assessment of continuous pain in newborns admitted  
40 474 to NICU s in 18 E uropean countries. *Acta paediatrica*. 2017;106(8):1248-1259.  
41 475 .9 Tarjoman A, Vasigh A, Safari S, Borji M. Pain management in neonatal intensive care units :A  
42 476 cross sectional study of neonatal nurses in Ilam City. *Journal of Neonatal Nursing*.  
43 477 2019;25(3):136-138.  
44 478 .10 Lalloo C, Mohabir V, Campbell F, et al. Pediatric Project ECHO® for Pain: implementation and  
45 479 mixed methods evaluation of a virtual medical education program to support  
46 480 interprofessional pain management in children and youth. *BMC Medical Education*.  
47 481 2023;23(1):1-13.  
48 482 .11 Beck SL, Brant JM, Donohue R, et al. Oncology nursing certification: relation to nurses'  
49 483 knowledge and attitudes about pain, patient-reported pain care quality, and pain outcomes.  
50 484 Paper presented at: Oncology nursing forum2016.  
51 485 .12 Brant JM, Mohr C, Coombs NC, Finn S, Wilmarth E. Nurses' knowledge and attitudes about  
52 486 pain: personal and professional characteristics and patient reported pain satisfaction. *Pain*  
53 487 *Management Nursing*. 2017;18(4):214-223.  
54 488 .13 Alley LG. The influence of an organizational pain management policy on nurses' pain  
55 489 management practices. Paper presented at: Oncology Nursing Forum2001.  
56  
57  
58  
59  
60

1  
2  
3  
4  
5  
6  
7  
8  
9  
10  
11  
12  
13  
14  
15  
16  
17  
18  
19  
20  
21  
22  
23  
24  
25  
26  
27  
28  
29  
30  
31  
32  
33  
34  
35  
36  
37  
38  
39  
40  
41  
42  
43  
44  
45  
46  
47  
48  
49  
50  
51  
52  
53  
54  
55  
56  
57  
58  
59  
60

- 490 .14 Latimer MA, Ritchie JA, Johnston CC. Individual nurse and organizational context considerations for better knowledge use in pain care. *Journal of pediatric nursing*. 2010;25(4):274-281.
- 491  
492
- 493 .15 Losacco V, Cuttini M, Greisen G, et al. Heel blood sampling in European neonatal intensive care units: compliance with pain management guidelines. *Archives of Disease in Childhood-Fetal and Neonatal Edition*. 2011;96(1):F65-F68.
- 494  
495
- 496 .16 Stevens B, Riahi S, Cardoso R, et al. The influence of context on pain practices in the NICU: perceptions of health care professionals. *Qualitative Health Research*. 2011;21(6):757-770.
- 497  
498 .17 Razeq NMA, Akuma AO, Jordan S. Status of neonatal pain assessment and management in Jordan. *Pain Management Nursing*. 2016;17(4):239-248.
- 499  
500 .18 Cronin P, Coughlan M, Smith V. *Understanding nursing and healthcare research*. Sage; 2014.
- 501 .19 Lambert SD, Loiselle CG. Combining individual interviews and focus groups to enhance data richness. *Journal of advanced nursing*. 2008;62(2):228-237.
- 502  
503 .20 Graneheim UH, Lundman B. Qualitative content analysis in nursing research: concepts, procedures and measures to achieve trustworthiness. *Nurse education today*. 2004;24(2):105-112.
- 504  
505
- 506 .21 Lincoln YS, Guba EG. *Naturalistic inquiry*. Newbury Park, CA: Sage; 1985.
- 507 .22 Arnold EC, Boggs KU. *Interpersonal relationships e-book: professional communication skills for nurses*. Elsevier Health Sciences; 2019.
- 508  
509 .23 Schneider D. Informal Interactions, Gender, and Hierarchy: Barriers to Nurse-Physician Collaboration in a West Coast Hospital. 2015.
- 510  
511 .24 Mirlashari J, Brown H, Fomani FK, de Salaberry J, Zadeh TK, Khoshkhou F. The challenges of implementing family-centered care in NICU from the perspectives of physicians and nurses. *Journal of pediatric nursing*. 2020;50:e91-e98.
- 512  
513
- 514 .25 Balice-Bourgeois C, Zumstein-Shaha M, Vanoni F, Jaques C, Newman CJ, Simonetti GD. A systematic review of clinical practice guidelines for acute procedural pain on neonates. *The Clinical journal of pain*. 2020;36(5):390-398.
- 515  
516 .26 Balice-Bourgeois C, Zumstein-Shaha M, Simonetti GD, Newman CJ. Interprofessional collaboration and involvement of parents in the management of painful procedures in newborns. *Frontiers in Pediatrics*. 2020;8.
- 517  
518  
519
- 520 .27 Razeq NMA. Barriers that impede the provision of pain care to neonates by nurses in Jordan. *Journal of Obstetric, Gynecologic & Neonatal Nursing*. 2016;45(3):371-377.
- 521  
522 .28 Tavernier SS, Guo J-W, Eaton J, Brant JM, Berry P, Beck SL. Context matters for nurses leading pain improvement in US hospitals. *Pain Management Nursing*. 2018;19(5):474-486.
- 523  
524 .29 Vestergaard E, Nørgaard B. Interprofessional collaboration: An exploration of possible prerequisites for successful implementation. *Journal of Interprofessional Care*. 2018;32(2):185-195.
- 525  
526 .30 Hassankhani H, Negarandeh R, Abbaszadeh M, Jabraeili M. The role of mothers during painful procedures on neonates: A focused ethnography. *Journal of Neonatal Nursing*. 2020.
- 527  
528 .31 Neshat H, Hassankhani H, Negarandeh R, Jabraeili M, Hosseini MB, Mahallei M. Care providers' experiences regarding barriers to maternal participation in neonatal pain management. *Nursing in Critical Care*. 2023;28(2):245-252.
- 529  
530  
531
- 532 .32 Khajeh M, Nayeri ND, Bahramnezhad F, Hoseini ASS. Family centered care of hospitalized children: a hybrid concept analysis in Iran. *Health promotion perspectives*. 2017;7(4):210.
- 533  
534 .33 Axelin A, Anderzén-Carlsson A, Eriksson M, Pölkki T, Korhonen A, Franck LS. Neonatal intensive care nurses' perceptions of parental participation in infant pain management. *The Journal of perinatal & neonatal nursing*. 2015;29(4):363-374.
- 535  
536 .34 Cong X, McGrath JM, Delaney C, et al. Neonatal nurses' perceptions of pain management: survey of the United States and China. *Pain Management Nursing*. 2014;15(4):834-844.
- 537  
538

- 1  
2  
3 539 .35 Morley L, Cashell A. Collaboration in Health Care. *Journal of Medical Imaging and Radiation Sciences*. 2017;48(2):207-216.  
4 540  
5 541 .36 Axelin A, Lehtonen L, Pelander T, Salanterä S. Mothers' different styles of involvement in  
6 542 preterm infant pain care. *Journal of Obstetric, Gynecologic & Neonatal Nursing*.  
7 543 2010;39(4):415-424.  
8 544 .37 Alinejad-Naeini M, Peyrovi H, Shoghi M. Childbearing culture: a prominent context in the  
9 545 process of maternal role attainment in Iranian mothers with preterm neonates. *Journal of*  
10 546 *Biosocial Science*. 2022;54(6):1035-1046.  
11 547 .38 Ullsten A, Andreasson M, Eriksson M. State of the art in parent-delivered pain-relieving  
12 548 interventions in neonatal care: a scoping review. *Frontiers in Pediatrics*. 2021;9:651846.  
13 549 .39 Franck LS, O'Brien K. The evolution of family-centered care: From supporting parent-delivered  
14 550 interventions to a model of family integrated care. *Birth defects research*. 2019;111(15):1044-  
15 551 1059.  
16 552 .40 Ponthier L, Ensuque P, Guignonis V, et al. Parental presence during painful or invasive  
17 553 procedures in neonatology: A survey of healthcare professionals. *Archives de Pédiatrie*.  
18 554 2020;27(7):362-367.  
19 555 .41 Shirazi ZH, Soltanian M, Sarvestani RS. Relief and care in the shade: A concept extracted from  
20 556 practices of neonatal nurses during pain management. *Nursing Practice Today*. 2020;7(in  
21 557 press):X-X.  
22 558 .42 Querido DL, Christoffel MM, Machado MED, de Almeida VS ,dos Santos Esteves APV, de  
23 559 Carvalho Matos PB. Perceptions of professionals on neonatal pain: a descriptive study. *Online*  
24 560 *Brazilian Journal of Nursing*. 2017;16(4):420-430.  
25 561 .43 Gradin M, Eriksson M, Group Ni. Neonatal pain assessment in Sweden—a fifteen-year follow  
26 562 up. *Acta paediatrica*. 2011;100(2):204-208.  
27 563 .44 Carachi P, Williams G. Acute pain management in the neonate. *Anaesthesia & Intensive Care*  
28 564 *Medicine*. 2020;21(2):99-104.  
29 565 .45 American Academy of Pediatrics. Prevention and Management of Procedural Pain in the  
30 566 Neonate: An Update. *Pediatrics*. 2016;137(2):e20154271.  
31 567 .46 Stevens BJ, Yamada J, Estabrooks CA, et al. Pain in hospitalized children: effect of a  
32 568 multidimensional knowledge translation strategy on pain process and clinical outcomes.  
33 569 *PAIN®*. 2014;15.68-60:(1)5  
34 570 .47 Rochefort CM, Rathwell BA, Clarke SP. Rationing of nursing care interventions and its  
35 571 association with nurse-reported outcomes in the neonatal intensive care unit: a cross-  
36 572 sectional survey. *BMC nursing*. 2016;15:1-8.  
37 573 .48 Neshat H, Hassankhani H, Jabraeili M, Negarandeh R, Hosseini M, Mahallei M. Views of nurses  
38 574 regarding pain control in neonatal intensive care units. *Family Medicine & Primary Care*  
39 575 *Review*. 2022;24(4):328-333.  
40 576 .49 Peng NH, Lee MC, Su WL, et al. Knowledge, attitudes and practices of neonatal professionals  
41 577 regarding pain management. *European Journal of Pediatrics*. 2020.  
42 578 .50 Rajasoorya C. Clinical ward rounds-challenges and opportunities. *Ann Acad Med Singapore*.  
43 579 2016;45(4):152-156.  
44 580 .51 Bhatti AM. KNOWLEDGE TRANSLATION IN HEALTHCARE-TIME TO BRIDGE KNOWLEDGE AND  
45 581 ACTION GAP. *Pakistan Armed Forces Medical Journal*. 2019;69(1):1-3.  
46  
47  
48  
49  
50  
51  
52 582  
53  
54  
55  
56  
57  
58  
59  
60

## COREQ (CONsolidated criteria for REporting Qualitative research) Checklist

A checklist of items that should be included in reports of qualitative research. You must report the page number in your manuscript where you consider each of the items listed in this checklist. If you have not included this information, either revise your manuscript accordingly before submitting or note N/A.

| Topic                                          | Item No. | Guide Questions/Description                                                                                                                              | Reported on Page No. |
|------------------------------------------------|----------|----------------------------------------------------------------------------------------------------------------------------------------------------------|----------------------|
| <b>Domain 1: Research team and reflexivity</b> |          |                                                                                                                                                          |                      |
| <i>Personal characteristics</i>                |          |                                                                                                                                                          |                      |
| Interviewer/facilitator                        | 1        | Which author/s conducted the interview or focus group?                                                                                                   |                      |
| Credentials                                    | 2        | What were the researcher's credentials? E.g. PhD, MD                                                                                                     |                      |
| Occupation                                     | 3        | What was their occupation at the time of the study?                                                                                                      |                      |
| Gender                                         | 4        | Was the researcher male or female?                                                                                                                       |                      |
| Experience and training                        | 5        | What experience or training did the researcher have?                                                                                                     |                      |
| <i>Relationship with participants</i>          |          |                                                                                                                                                          |                      |
| Relationship established                       | 6        | Was a relationship established prior to study commencement?                                                                                              |                      |
| Participant knowledge of the interviewer       | 7        | What did the participants know about the researcher? e.g. personal goals, reasons for doing the research                                                 |                      |
| Interviewer characteristics                    | 8        | What characteristics were reported about the interviewer/facilitator? e.g. Bias, assumptions, reasons and interests in the research topic                |                      |
| <b>Domain 2: Study design</b>                  |          |                                                                                                                                                          |                      |
| <i>Theoretical framework</i>                   |          |                                                                                                                                                          |                      |
| Methodological orientation and Theory          | 9        | What methodological orientation was stated to underpin the study? e.g. grounded theory, discourse analysis, ethnography, phenomenology, content analysis |                      |
| <i>Participant selection</i>                   |          |                                                                                                                                                          |                      |
| Sampling                                       | 10       | How were participants selected? e.g. purposive, convenience, consecutive, snowball                                                                       |                      |
| Method of approach                             | 11       | How were participants approached? e.g. face-to-face, telephone, mail, email                                                                              |                      |
| Sample size                                    | 12       | How many participants were in the study?                                                                                                                 |                      |
| Non-participation                              | 13       | How many people refused to participate or dropped out? Reasons?                                                                                          |                      |
| <i>Setting</i>                                 |          |                                                                                                                                                          |                      |
| Setting of data collection                     | 14       | Where was the data collected? e.g. home, clinic, workplace                                                                                               |                      |
| Presence of non-participants                   | 15       | Was anyone else present besides the participants and researchers?                                                                                        |                      |
| Description of sample                          | 16       | What are the important characteristics of the sample? e.g. demographic data, date                                                                        |                      |
| <i>Data collection</i>                         |          |                                                                                                                                                          |                      |
| Interview guide                                | 17       | Were questions, prompts, guides provided by the authors? Was it pilot tested?                                                                            |                      |
| Repeat interviews                              | 18       | Were repeat interviews carried out? If yes, how many?                                                                                                    |                      |
| Audio/visual recording                         | 19       | Did the research use audio or visual recording to collect the data?                                                                                      |                      |
| Field notes                                    | 20       | Were field notes made during and/or after the interview or focus group?                                                                                  |                      |
| Duration                                       | 21       | What was the duration of the interviews or focus group?                                                                                                  |                      |
| Data saturation                                | 22       | Was data saturation discussed?                                                                                                                           |                      |
| Transcripts returned                           | 23       | Were transcripts returned to participants for comment and/or                                                                                             |                      |

| Topic                                  | Item No. | Guide Questions/Description                                                                                                        | Reported on Page No. |
|----------------------------------------|----------|------------------------------------------------------------------------------------------------------------------------------------|----------------------|
|                                        |          | correction?                                                                                                                        |                      |
| <b>Domain 3: analysis and findings</b> |          |                                                                                                                                    |                      |
| <i>Data analysis</i>                   |          |                                                                                                                                    |                      |
| Number of data coders                  | 24       | How many data coders coded the data?                                                                                               |                      |
| Description of the coding tree         | 25       | Did authors provide a description of the coding tree?                                                                              |                      |
| Derivation of themes                   | 26       | Were themes identified in advance or derived from the data?                                                                        |                      |
| Software                               | 27       | What software, if applicable, was used to manage the data?                                                                         |                      |
| Participant checking                   | 28       | Did participants provide feedback on the findings?                                                                                 |                      |
| <i>Reporting</i>                       |          |                                                                                                                                    |                      |
| Quotations presented                   | 29       | Were participant quotations presented to illustrate the themes/findings?<br>Was each quotation identified? e.g. participant number |                      |
| Data and findings consistent           | 30       | Was there consistency between the data presented and the findings?                                                                 |                      |
| Clarity of major themes                | 31       | Were major themes clearly presented in the findings?                                                                               |                      |
| Clarity of minor themes                | 32       | Is there a description of diverse cases or discussion of minor themes?                                                             |                      |

Developed from: Tong A, Sainsbury P, Craig J. Consolidated criteria for reporting qualitative research (COREQ): a 32-item checklist for interviews and focus groups. *International Journal for Quality in Health Care*. 2007. Volume 19, Number 6: pp. 349 – 357

**Once you have completed this checklist, please save a copy and upload it as part of your submission. DO NOT include this checklist as part of the main manuscript document. It must be uploaded as a separate file.**
